# 1 **BFG-PCA: tools and resources that expand the potential for binary** 2 **protein interaction discovery**

3

4 Daniel Evans-Yamamoto<sup>1-4</sup>, François D. Rouleau<sup>1,2,5,6</sup>, Piyush Nanda<sup>2,Æ</sup>, Koji Makanae<sup>2</sup>, Yin  
5 Liu<sup>2,‡</sup>, Philippe C. Després<sup>1,2,5,6</sup>, Hitoshi Matsuo<sup>2,∞</sup>, Motoaki Seki<sup>2,§</sup>, Alexandre K. Dube<sup>1,5-7</sup>, Diana  
6 Ascencio<sup>1,5-7</sup>, Nozomu Yachie<sup>2-4,‡,¶</sup> & Christian R. Landry<sup>1,5-7,¶</sup>

7

8 <sup>1</sup> Institut de Biologie Intégrative et des Systèmes, Université Laval, Québec, QC, Canada

9 <sup>2</sup> Research Center for Advanced Science and Technology, University of Tokyo, Tokyo, Japan

10 <sup>3</sup> Systems Biology Program, Graduate School of Media and Governance, Keio University,  
11 Fujisawa, Japan

12 <sup>4</sup> Institute for Advanced Biosciences, Keio University, Fujisawa, Japan

13 <sup>5</sup> Regroupement Québécois de Recherche sur la Fonction, l'Ingénierie et les Applications des  
14 Protéines, (PROTEO), Université Laval, Québec, QC, Canada

15 <sup>6</sup> Département de biochimie, microbiologie et bio-informatique, Université Laval, Québec, QC,  
16 Canada

17 <sup>7</sup> Département de Biologie, Université Laval, Québec, QC, Canada

18 <sup>Æ</sup> Current affiliation: Department of Molecular and Cellular Biology, Harvard University,  
19 Cambridge, Massachusetts, United States of America

20 <sup>‡</sup> Current affiliation: School of Biomedical Engineering, University of British Columbia,  
21 Vancouver, Canada

22 <sup>∞</sup> Current affiliation: Department of Biological Sciences, Graduate School of Science, The  
23 University of Tokyo, Tokyo, Japan

24 <sup>§</sup> Current affiliation: Department of Molecular Oncology, Graduate School of Medicine, Chiba  
25 University, Chiba, Japan

26 <sup>¶</sup> Correspondence should be addressed to N.Y. (nozomu.yachie@ubc.ca) and C.R.L.  
27 (christian.landry@bio.ulaval.ca)

28

29

## 30 **Abstract**

31 Barcode fusion genetics (BFG) utilizes deep sequencing to improve the throughput of  
32 protein-protein interaction (PPI) screening in pools. BFG has been implemented in Yeast  
33 two-hybrid (Y2H) screens (BFG-Y2H). While Y2H requires test protein pairs to localize in the  
34 nucleus for reporter reconstruction, Dihydrofolate Reductase Protein-Fragment  
35 Complementation Assay (DHFR-PCA) allows proteins to localize in broader subcellular contexts  
36 and proves to be largely orthogonal to Y2H. Here, we implemented BFG to DHFR-PCA  
37 (BFG-PCA). This plasmid-based system can leverage ORF collections across model organisms  
38 to perform comparative analysis, unlike the original DHFR-PCA that requires yeast genomic  
39 integration. The scalability and quality of BFG-PCA were demonstrated by screening human  
40 and yeast interactions of >11,000 protein pairs. BFG-PCA showed high-sensitivity and  
41 high-specificity for capturing known interactions for both species. BFG-Y2H and BFG-PCA  
42 capture distinct sets of PPIs, which can partially be explained based on the domain orientation  
43 of the reporter tags. BFG-PCA is a high-throughput protein interaction technology to interrogate  
44 binary PPIs that exploits clone collections from any species of interest, expanding the scope of  
45 PPI assays.

## 46 **Running title**

47 Pooled matrix PPI screening with BFG-PCA

## 48 **Keywords**

49 Barcode Fusion Genetics/DHFR-PCA/DNA barcodes/Protein-protein interaction

## 50 Introduction

51 In cellular systems, proteins form functional modules and/or complexes that underlie most  
52 biological processes by physically interacting with each other (Alberts 1998; Vidal, Cusick, and  
53 Barabási 2011). Discovering such interaction networks is one of the main goals of systems  
54 biology. Two major approaches to detect protein-protein interactions (PPIs) have contributed the  
55 bulk of the current data, affinity purification followed by mass spectrometry (AP/MS), and  
56 methods such as Yeast two-hybrid (Y2H) and protein complementation assay (PCA). The  
57 former approach detects biomolecular association among group of proteins from cellular  
58 fractions (Rigaut et al. 1999; Ren et al. 2003; Roux et al. 2012; Gillet et al. 2012), whereas the  
59 latter detect direct “binary” or pairwise PPIs, by tagging each interaction partner, the bait and the  
60 prey, using reporter protein fragments (Fields and Song 1989; Hu, Chinenov, and Kerppola  
61 2002; Tarassov et al. 2008). Other approaches such as proximity-dependent biotinylation *in vivo*  
62 (Roux et al. 2012; Rhee et al. 2013; Go et al. 2021), co-elution and co-fractionation (Salas et al.  
63 2020)(Kristensen, Gsponer, and Foster 2012) and protein-cross linking (C. Yu and Huang 2018;  
64 Bruce 2012; Sinz 2010) also contribute to the dissection of PPI networks, with varying degrees  
65 of resolution.

66 Binary interaction screenings are powerful approaches owing to their relatively simple  
67 implementation in terms of instrumentation. Up to now, systematic high-quality Y2H screening  
68 (Venkatesan et al. 2009) has revealed the largest binary interactome network to date, covering  
69 the entire human and yeast proteomes (Luck et al. 2020). Because of their scalability, Y2H has  
70 also been applied to a large number of model organisms, including for instance Arabidopsis and  
71 Drosophila (Arabidopsis Interactome Mapping Consortium 2011; Li et al. 2004; Rajagopala et al.  
72 2014; H. Yu et al. 2008). Despite such efforts, we are far from a complete interactome map  
73 when considering various “proteoforms” (Smith, Kelleher, and Consortium for Top Down  
74 Proteomics 2013; Aebersold et al. 2018), disease mutations (Sahni et al. 2013) and protein  
75 polymorphisms that can have distinct biophysical interaction profiles (Corominas et al. 2014).

76 One of the limiting factors associated with binary detection methods is the need to perform  
77 pairwise tests between baits and preys in a comprehensive manner because these pairwise  
78 tests are dominated by negative results. However, the application of next generation  
79 sequencing (NGS) has played a key role in increasing throughput, and thus, interactome  
80 coverage (Yachie et al. 2016; Trigg et al. 2017; Schlecht et al. 2017, 2012; J.-S. Yang et al.  
81 2018; F. Yang et al. 2018). Combined with methods that involve cell survival as detection  
82 signals, NGS facilitates the exploration of the search space of PPIs because of the enrichment

83 of positive PPIs. One of the first studies that have implemented a pooled screening approach  
84 using NGS, Stitch-seq, allowed the identification of interacting baits and preys in pooled assays  
85 through fusion PCR of bait and prey ORFs after selecting for interacting pairs (Rolland et al.  
86 2014; H. Yu et al. 2011). Several other approaches exploiting this principle have been  
87 implemented. They include Barcode Fusion Genetics (BFG) (Yachie et al. 2016), PPI-seq  
88 (Schlecht et al. 2017; Liu et al. 2020), which use synthetic DNA barcodes to tag their gene of  
89 interests and CrY2H-seq (Trigg et al. 2017), rec-YnH (J.-S. Yang et al. 2018), and RLL-Y2H (F.  
90 Yang et al. 2018), which use the Open Reading Frame (ORF) sequences itself to identify the  
91 protein pairs. Using ORF sequences as identifiers offers simplicity to the design but DNA  
92 barcodes may be more reliable in terms of accuracy and performance, and may reduce  
93 sequencing costs, although they may require more investment upstream of the screens.

94 BFG was recently adapted to Y2H screening. In BFG experiments, bait and prey plasmids  
95 contain DNA barcodes that are fused through intra-cellular recombination in cells that survive  
96 selection on a specific media. Sequencing of the fused barcodes allows the identification of the  
97 interacting pairs in bulk (**Fig 1A**). Because the barcode fusion technology is portable to other  
98 approaches in yeast genetics, it could be used to adapt other binary mapping methods to  
99 pooled screening and thus enable a better coverage of PPI networks. Indeed, different assays  
100 have little but significant overlap of positive interactions, and it is important to assay PPIs with  
101 multiple orthogonal assays to comprehensively map interactomes (Braun et al. 2009; Choi et al.  
102 2019). For instance, systematic benchmarking of various complementary assays in yeast and  
103 human cells has reported that each method captures only ~35% of the confident positive  
104 reference PPI set (HsPRSV1) (Braun et al. 2009). Even more revealing for this study, for binary  
105 assays, the currently reported *S. cerevisiae* PPIs by Y2H and PCA share only 525 unique  
106 interactions (Y2H: 12,995; PCA: 6,739; Union: 19,209; Jaccard Index: 0.027), despite each  
107 method having proteome wide PPI mapping efforts of similar quality (H. Yu et al. 2008; Tarassov  
108 et al. 2008; Stark et al. 2006). There are many reasons why different methods cover different  
109 parts of PPI networks. For instance, reporter proteins or protein fragments are fused at either  
110 the N or C termini and some may require the localization of proteins to specific cell  
111 compartments (Buntru et al. 2016) (**Figs 1B and 1C**).

112 BFG enables pooled matrix screening that exploits various selection markers affecting growth  
113 (Yachie et al. 2016). DHFR-PCA is a binary PPI detection method based on growth via the  
114 reconstitution of a mutant DHFR in yeast cells, which provides resistance to the drug  
115 methotrexate (Tarassov et al. 2008). Contrary to Y2H, DHFR-PCA does not require the addition

116 of a nuclear localization for reporter activation, and in principle enables PPI detection in the  
117 protein pair's native subcellular context. Until now, efforts to map PPIs by DHFR-PCA have  
118 focused on interactions present *in vivo* by tagging DHFR fragments to genomic loci, even when  
119 barcodes are used for pooled based assays (Schlecht et al. 2017, 2012). Although this comes  
120 with many advantages, it also comes with limitations depending on the questions being  
121 addressed. For instance, protein expression levels are largely regulated by the environment,  
122 making interactions of weakly expressed/unexpressed proteins difficult to detect in some  
123 conditions. Having bait and prey proteins expressed from plasmids could help alleviate this  
124 limitation. Controlling or uniformizing expression level may help differentiate transcriptional  
125 versus post transcriptional effects on PPIs in experiments comparing different growth conditions  
126 (Celaj et al. 2017; Schlecht et al. 2017). Another advantage of plasmid-based screening is that it  
127 allows for screening PPIs for protein variants, or among proteins from other species or between  
128 species, provided the coding sequences can be cloned and expressed in yeast. Here, we  
129 developed and made publicly available affordable resources for BFG-DHFR-PCA (henceforth  
130 BFG-PCA) and we used this resource to demonstrate the efficacy of BFG-PCA by screening  
131 11,232 bait-prey pairs (**Fig 1D**). We show that BFG-PCA enables the detection of *in vivo* PPIs  
132 and the comparison side-by-side with BFG-Y2H demonstrates that they capture distinct sets of  
133 PPIs.

134

135

136

137

138

139

140

141

142

143

144

145

146

147

148

149

150

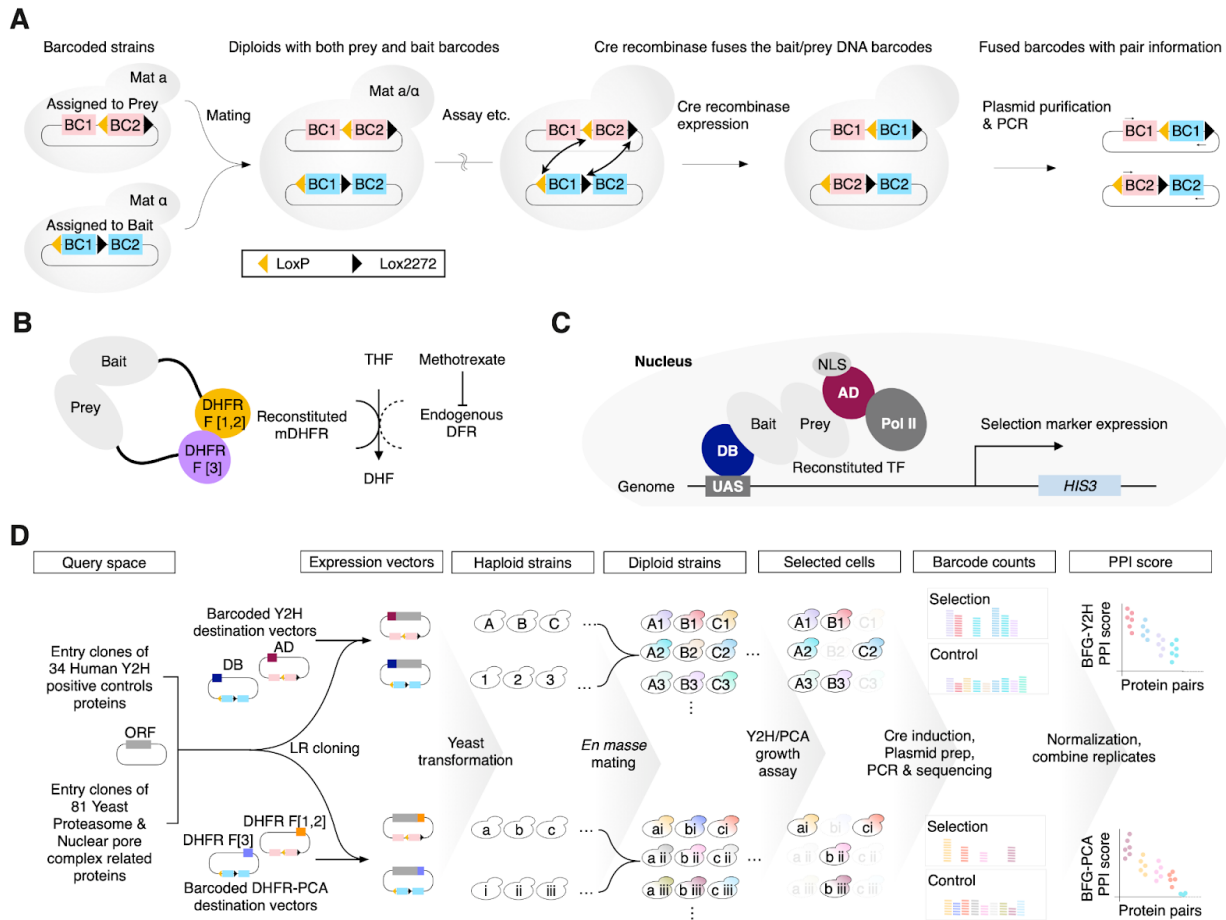

151

152 **Figure 1. Overview of this study.**

- 153 A. Schematic of Barcode Fusion Genetics (Yachie et al. 2016). BFG barcode cassettes are  
 154 assigned to each of the bait and prey with 2 DNA barcodes (BC1 and BC2), with one of  
 155 them flanked by Cre recombination site LoxP and Lox2272. The bait and prey plasmids  
 156 with BFG barcode cassettes are introduced to MAT $\alpha$  and MATa cells, respectively. Upon  
 157 mating, the diploid cells have both the bait and prey plasmids and their barcode  
 158 cassettes. By inducing expression of the Cre recombinase, the BC1<sub>bait</sub> and BC2<sub>prey</sub>  
 159 are swapped between the plasmids, resulting in barcode fusions BC1<sub>prey</sub>-BC1<sub>bait</sub> and  
 160 BC2<sub>bait</sub>-BC2<sub>prey</sub>, having the bait-prey pair information. Each of the bait and prey barcodes  
 161 have a common primer site flanking the barcode region unique to the type of barcode,  
 162 enabling specific PCR amplification of the BC1<sub>prey</sub>-BC1<sub>bait</sub> and BC2<sub>prey</sub>-BC2<sub>bait</sub>  
 163 products. By counting the number of barcode pairs by deep sequencing, one can estimate the  
 164 relative abundance of diploids in the pool.
- 165 B. Illustration of the DHFR-PCA reporter. In DHFR-PCA, DHFR F[1,2] and DHFR F[3] are  
 166 fused to bait and prey proteins, respectively. Upon interaction, the DHFR fragments  
 167 come in proximity, reconstituting the methotrexate-resistant murine DHFR enzyme  
 168 (mDHFR) while the conditionally essential endogenous DHFR is inhibited by the drug  
 169 methotrexate (MTX).
- 170 C. Illustration of the Y2H reporter. In Y2H, the DNA binding domain (DB) and the activator  
 171 domain (AD) of the Gal4 transcription factor (TF) are fused to bait and prey proteins,

172 respectively. The fused proteins are localized to the nucleus by the nuclear localization  
173 signal (NLS). The DB domain will bind to the upstream activation sequence (UAS).  
174 When the bait and prey proteins interact, the Gal4TF is reconstituted, recruiting RNA  
175 polymerase II, expressing the selection marker of choice. We used the *HIS3* marker with  
176 medium lacking histidine for Y2H selection throughout this study.

177 D. Overview of the BFG screening. We queried 115 proteins from Human and Yeast, and  
178 Gateway cloned them to barcoded Y2H and DHFR-PCA destination vectors with 2  
179 barcode replicates each. We individually transformed haploid strains with the barcoded  
180 expression vectors. The haploid strains were pooled for *en masse* mating, generating all  
181 possible bait-prey pairs of diploids. After selecting diploid cells, we performed pooled  
182 selection for each method. After selection, we induced Cre expression for barcode  
183 fusion, purified the plasmids, and PCR amplified the barcodes for illumina sequencing.  
184 We counted barcodes, normalized them by the barcode counts in the control condition  
185 and background auto-activity of the strains. The replicates were combined for each  
186 protein pair, generating the final PPI score for each method to call PPIs.

187

## 188 Results and discussion

### 189 Adapting DHFR-PCA for plasmid-based PPI detection

190 Gateway cloning compatible destination vectors and yeast strains were generated for BFG-PCA  
191 and are available through Addgene. We constructed a collection of 1,483 centromeric Gateway  
192 compatible plasmids with unique barcodes (893 for DHFR F[1,2] and 590 for DHFR F[3]),  
193 enabling assays of up to 526,870 protein pairs in pools using barcode fusion and sequencing  
194 (**Table EV1**). The functionality of these plasmids for DHFR-PCA and strains was first examined  
195 by performing a growth assay on 8 protein pairs consisting of 4 known PPI and 4 pairs not  
196 reported to interact. As expected, all pairs showed similar growth on the non-selective  
197 (-methotrexate) condition and pairs with reported interactions showed growth on the selective  
198 (+methotrexate) condition (**Fig EV1A**).

199

200 To further examine the performance of plasmid based DHFR-PCA, we performed a DHFR-PCA  
201 assay on 300 protein pairs using the established protocol on solid media (Rochette et al. 2015)  
202 (**Fig EV1B and C**) with these plasmids. The selected space included DHFR-PCA expected  
203 positives and likely negatives for quality assessment (**Fig EV1B**). Likely negative pairs were  
204 selected based on the BioGRID database (version 3.4.157) (Stark et al. 2006), with criteria  
205 including 1) no reported physical or genetic interaction for the yeast proteins or their orthologs in  
206 *Schizosaccharomyces pombe* and *Homo sapiens*, 2) no shared gene ontology terms, and 3) a  
207 distance greater than 2 edges in the PPI network. The PPI score of each pair was calculated  
208 based on colony sizes estimated from plate images (**Fig EV1C**), and sorted to examine  
209 agreement with known PPIs (**Fig EV1D**). Protein pairs with reported interactions were enriched  
210 for high PPI score pairs. We evaluated this by Mathew's Correlation Coefficient (MCC), giving a  
211 value of 0.462, comparable to reported PPIs in BioGRID with either Y2H (MCC = 0.488) or PCA  
212 (MCC = 0.403). The raw PPI score and details of each protein pair are shown in Tables EV1  
213 and EV2.



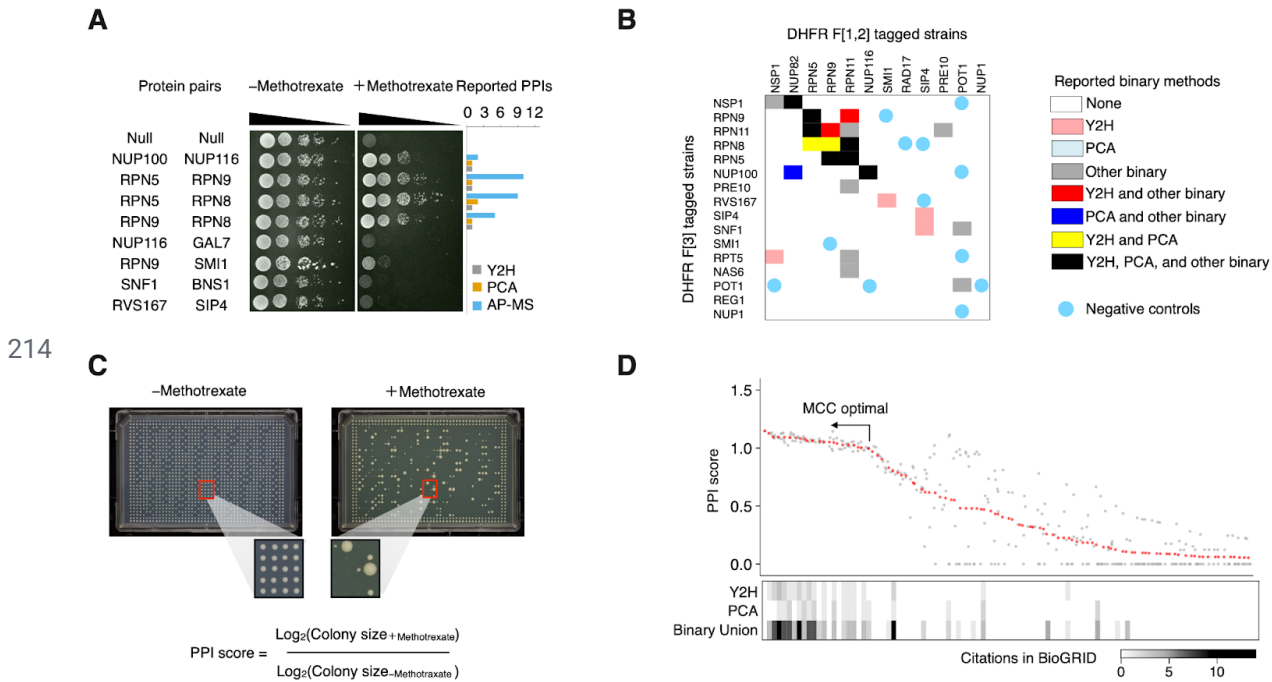

215 **Figure EV1. Plasmid-based DHFR-PCA captures known PPIs.**

- 216 A. Plasmid based DHFR-PCA spot assays were performed on 8 protein pairs. Null-Null  
 217 represents empty vector (destination plasmid) control. Reported PPIs in BioGRID are  
 218 shown in the barplot. While all pairs grow under no methotrexate control  
 219 (-Methotrexate), only protein pairs expected to have interactions show growth with  
 220 presence of methotrexate (+Methotrexate).
- 221 B. A subset of the query space to demonstrate the quality of plasmid-based DHFR-PCA,  
 222 which was also tested by BFG-PCA (see following section). Previously known  
 223 interactions are indicated in colors according to the method.
- 224 C. An example of a DHFR-PCA high density plate. The colony formed from replicating the  
 225 same cell sample is grown on control (-Methotrexate) and selection (+Methotrexate)  
 226 plates. Colony size is measured based on plate images, log-transformed and used to  
 227 calculate PPI scores by fold-change between selection and control.
- 228 D. Result of an assay on 300 protein pairs ordered by PPI score rank. Only the top 100  
 229 protein pairs are shown. Grey dots represent replicates, and the red dot represents the  
 230 50<sup>th</sup> percentile threshold used to call the ranks. The heatmap shows previously reported  
 231 interactions in the BioGRID database. Binary union consists of interactions reported by  
 232 Y2H, PCA, Biochemical activity, Affinity Capture-Luminescence, Reconstituted Complex,  
 233 Co-crystal Structure, and FRET.

234

235

## 236 BFG-PCA screening condition optimization on 192 protein pairs

237 We performed a proof-of-concept BFG-PCA screening on a subset of 192 protein pairs assayed  
238 by plasmid based DHFR-PCA (**Figs EV1B, 2, DatasetEV1**), with the exception of those  
239 dropped out during barcoding and cloning. Previous DHFR-PCA conditions used a methotrexate  
240 concentration of 200  $\mu\text{g}/\text{mL}$  (Tarassov et al. 2008). However, Yachie et al (Yachie et al. 2016)  
241 have shown that BFG-Y2H performs better when selecting under less stringent conditions than  
242 standard Y2H (Yachie et al. 2016). Therefore, four concentrations (200, 100, 10 and 1  $\mu\text{g}/\text{mL}$ ) of  
243 methotrexate were tested to examine the optimal concentration for BFG-PCA (see **Fig 1D** for  
244 selection step). As expected, higher concentrations resulted in fewer and smaller colonies  
245 (**Appendix Fig S2A**). Deep sequencing confirmed that the signal-to-noise ratio (SNR) increases  
246 with increasing concentration (**Appendix Figs S2B and 2A**). We compared the standard  
247 DHFR-PCA (based on colony growth) with the BFG-PCA scores (computed based on fused  
248 barcode counts). As expected, there was no relationship between the colony-based signal and  
249 BFG-PCA signal for non-interacting pairs (low colony-based signal) but a strong one above a  
250 given threshold, which corresponds to expected positive PPIs. This led to an overall positive  
251 rank correlation for all tested BFG-PCA selection conditions (Kendall rank coefficient : 1 $\mu\text{g}/\text{mL}$ ,  
252 72 h = 0.141; 96 h = 0.211; 10 $\mu\text{g}/\text{mL}$ , 72 h = 0.228; 96 h = 0.252; 100 $\mu\text{g}/\text{mL}$ , 72 h = 0.287; 96 h =  
253 0.243; 200 $\mu\text{g}/\text{mL}$ , 72 h = 0.309; 96 h = 0.270;  $p < 0.01$ , **Figs 2B,G**). The increasing correlation at  
254 higher concentrations of methotrexate and longer incubation periods contributed to higher SNRs  
255 (**Fig 2F,H**).

256 Among the BFG-PCA conditions tested, 10  $\mu\text{g}/\text{mL}$  of methotrexate and 72 hours of selection  
257 yielded the best agreement with reported binary PPIs (**Figs 2C and 2D**), with a MCC of 0.61.  
258 One exception is an interaction between Pre10 and Rpt5 within the 26S proteasome complex,  
259 which had not been reported previously by any binary PPI detection method. The two proteins  
260 are neighbouring within the complex when mapped to the crystal structure (**Fig 2E**), suggesting  
261 this is a true positive interaction that has been missed from previous experiments. These  
262 conditions therefore appear to be optimal among the ones tested, for BFG-PCA screenings.

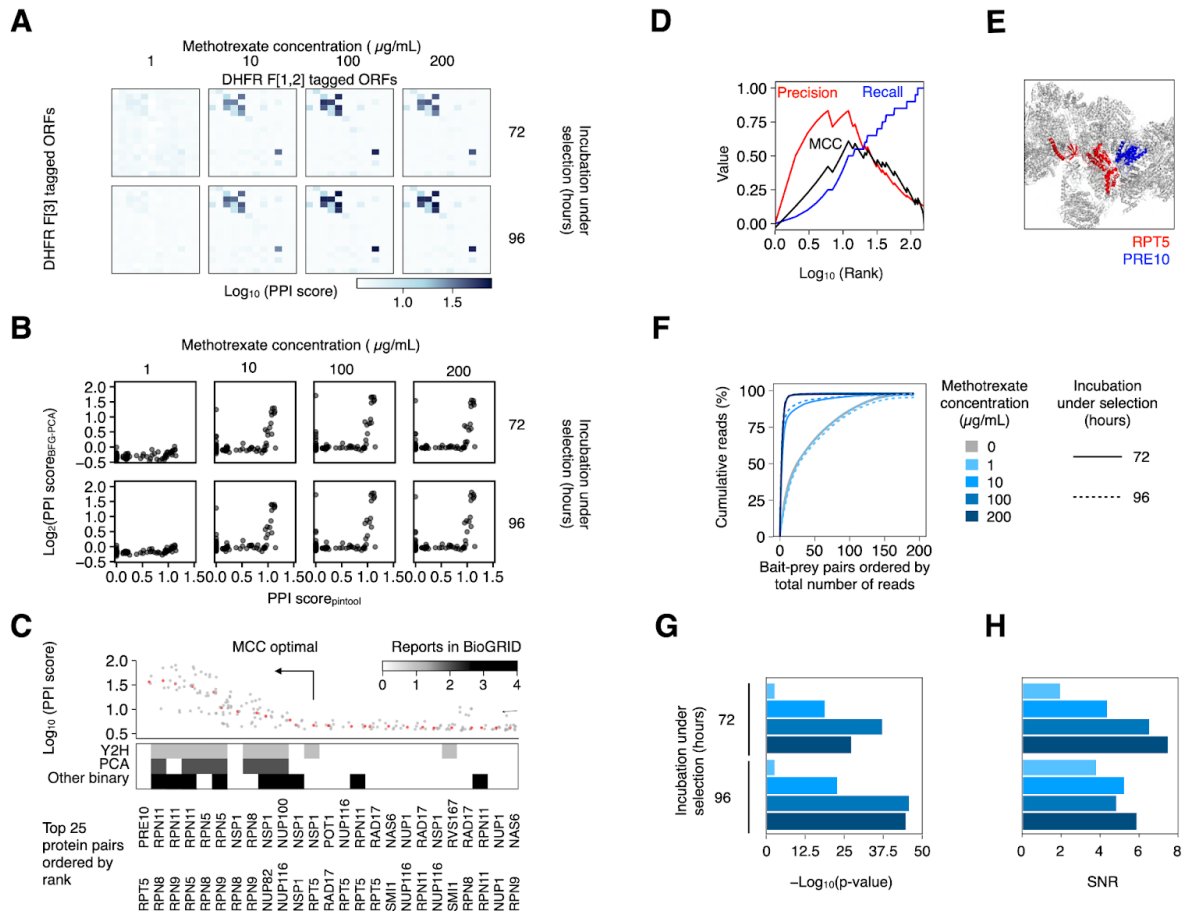

264 **Figure 2. BFG-PCA screening quality is on par with one-by-one assay.**

- 265 A. Heatmap of the BFG-PCA PPI score for each of the selection conditions. Baits and  
 266 preys are ordered as in the query matrix shown in Figure EV1B.
- 267 B. PPI scores obtained from one-by-one DHFR-PCA high density plate assay and  
 268 BFG-PCA.
- 269 C. PPI scores ordered by rank. Methotrexate concentration of 10 µg/mL with 72 h selection  
 270 is shown. Grey dots represent replicates, and the red dots represent the 50<sup>th</sup> quantile of  
 271 replicates used to call the rank. The heatmap represents reported interactions in the  
 272 BioGRID database for Y2H, PCA, and other binary PPI detection methods (Biochemical  
 273 activity, Affinity Capture-Luminescence, Reconstituted Complex, Co-crystal Structure,  
 274 and FRET).
- 275 D. Precision/recall curve of the BFG-PCA data with methotrexate concentration of 10 µg/mL  
 276 with 72 h of selection.
- 277 E. The top rank Pre10 and Rpt5, which had no previous binary interaction reported, are  
 278 highlighted on the crystal structure of the yeast 26S proteasome (PDB: 6J2X).
- 279 F. Cumulative plot of raw barcode counts per protein pair under each selection condition,  
 280 showing the number of protein pairs represented after sequencing.
- 281 G. & H. The Kendall rank correlation coefficient (G), and signal to noise ratio (H) for each  
 282 BFG-PCA condition against one-by-one DHFR-PCA. To compute the signal to noise  
 283 ratio, the PPI scores of 12 negative control pairs and the top 10 ranked scores were  
 284 averaged and used as background and signal, respectively.

285 BFG-PCA and BFG-Y2H screening on the Proteasome and Nuclear pore  
286 complex related proteins

287 Since BFG has only been implemented for Y2H, and Y2H is the most frequently used method  
288 for binary PPI screening, we compared BFG-PCA and BFG-Y2H side-by-side. We examined a  
289 space consisting of 120 proteins (34 human proteins as Y2H positive controls previously used in  
290 BFG-Y2H, 16 *S. cerevisiae* proteins used for the first demonstration of BFG-PCA, and 80 *S.*  
291 *cerevisiae* proteins associated with the proteasome complex and/or nuclear pore complex) with  
292 2 barcode replicates. We performed two screenings for both BFG-PCA and BFG-Y2H (**Fig 1D**),  
293 each covering 11,232 and 10,545 bait-prey pairs, respectively. The number of barcode  
294 replicates per ORF detected in each screening were mostly 2, with some having only 1 due to  
295 loss during the cloning process (**Appendix Fig S3A**). The distribution of bait/prey barcode  
296 abundance in the non-selective conditions, representing relative abundance of haploid strains  
297 before mating, followed a log-normal distribution in each screening as expected (**Appendix Fig**  
298 **S3B**). Similarly, the relative abundance of bait-prey barcodes, representing diploid strains,  
299 followed a log-normal distribution of barcodes in the non-selective conditions (**Appendix Fig**  
300 **S4**).

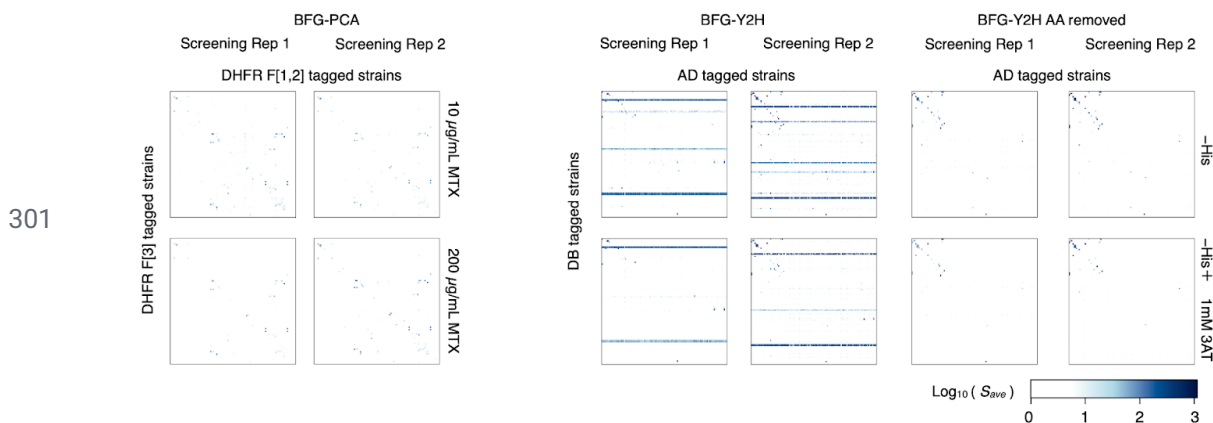

302 **Figure EV2. Enrichment of bait-prey barcodes in selective conditions compared to their**  
303 **respective non-selection conditions.**

304 Heatmap of enrichment signal ( $s$ ) shown for each bait-prey barcode in BFG-PCA and BFG-Y2H  
305 screenings. Note that the barcode fusion replicates (BC1-BC1 and BC2-BC2) were averaged for  
306 each bait-prey barcode. AA: Auto-activator.

307

308 We computed the enrichment score ' $s$ ' as growth enrichment of each bait-prey barcode in  
309 selective conditions compared to non-selective conditions. Under selection for both BFG-PCA  
310 and BFG-Y2H, some of the bait/prey barcodes exhibited strong background noise (**Fig EV2**,

311 **Appendix Fig S5**, and **DataEV2**). This is a commonly known phenomenon for DB strains in  
312 Y2H where some proteins directly recruit the transcription machinery without the presence of an  
313 interaction partner (Dreze et al. 2010) (**Fig 1B**). While BFG-Y2H involves a normalization for the  
314 auto-activity of problematic baits, we observed that several bait ORFs occupied >68% of all  
315 reads sequenced from selective condition libraries, which is wasted sequencing effort.  
316 Therefore, we performed an additional screening in duplicate with these strains removed for  
317 better assessment between BFG-PCA and BFG-Y2H. After removal of BFG-Y2H  
318 auto-activators, BFG-PCA and BFG-Y2H each covered 11,232 and 9,546 bait-prey pairs,  
319 respectively. When examining BFG-PCA signal data, we observed a similar but less intense  
320 auto-activity background (**Appendix Fig S5**) which we systematically normalized when  
321 computing PPI scores. This is a known phenomenon, where some proteins interact with the  
322 DHFR fragment or the linker alone, contributing to systematic background noise (Tarassov et al.  
323 2008). For implementation of either BFG-PCA or BFG-Y2H examining new baits and preys, it  
324 may therefore be necessary to first screen for auto-activity.

325

326 The enrichment signals within replicates, both internal and screening replicates, correlated  
327 strongly in each method (**Appendix Fig S6**), demonstrating their reproducibility. For each pair,  
328 we performed normalization of the enrichment scores based on auto-activity backgrounds  
329 (**Appendix Fig S7A**, see methods) to obtain PPI scores. For each of the 2 screening replicates  
330 performed, each protein pair had multiple levels of internal replicates corresponding to tagging  
331 orientation, barcoded strains, and barcode fusions (**Appendix Fig S6A**). When combining all  
332 the screening replicates and internal replicates, the average number of replicates for each  
333 protein pair was 23.8 and 21.6 for BFG-PCA and BFG-Y2H, respectively. Both screenings had  
334 over 99% of the protein pairs with more than 8 replicates (**Appendix Fig S6**). To call positives,  
335 we examined the best scoring method by testing average, median, and various percentile  
336 thresholds amongst the normalized score of replicates and by computing the best agreement  
337 against reported binary interactions in BioGRID (**Appendix Fig S7B**).

338

339 As a result, we detected 92 (MCC = 0.315) and 35 (MCC = 0.296) PPIs for BFG-PCA and  
340 BFG-Y2H, respectively (**Fig 3, DatasetEV3**). Although the overlap between the two methods  
341 was limited, for known binary PPIs, the PPI scores are correlated (**Fig 3E**) ( $R = 0.12$ ,  $p$ -value =  
342  $6.4 \times 10^{-3}$ , Kendall rank correlation). Since we included both human and yeast proteins, we  
343 performed the same analysis on the Human protein and yeast protein subsets individually (**Figs**

344 **EV3, EV4**). On the Human protein subset, BFG-PCA and BFG-Y2H detected 15 (MCC = 0.462),  
345 and 34 (MCC = 0.619) PPIs, respectively (**Fig EV3**). The difference between BFG-PCA and  
346 BFG-Y2H can be explained by the fact that known Y2H positive pairs have been deliberately  
347 included in the space as positive control. In addition, no PPI data is available on human proteins  
348 screened by DHFR-PCA so we had no a priori expectation for the performance of BFG-PCA on  
349 these. On the yeast protein subset, BFG-PCA and BFG-Y2H detected 80 (MCC = 0.311) and 8  
350 (MCC = 0.166) PPIs, respectively (**Fig EV4**). In conclusion, while BFG-Y2H had a higher overall  
351 ability for capturing the human PPIs, which was tailored as being positive controls for this  
352 method, BFG-PCA performed better when tested against a larger, non-tailored set of yeast  
353 protein pairs that are part of protein complexes, and had fewer issues of auto-activator proteins  
354 for this particular set of proteins.

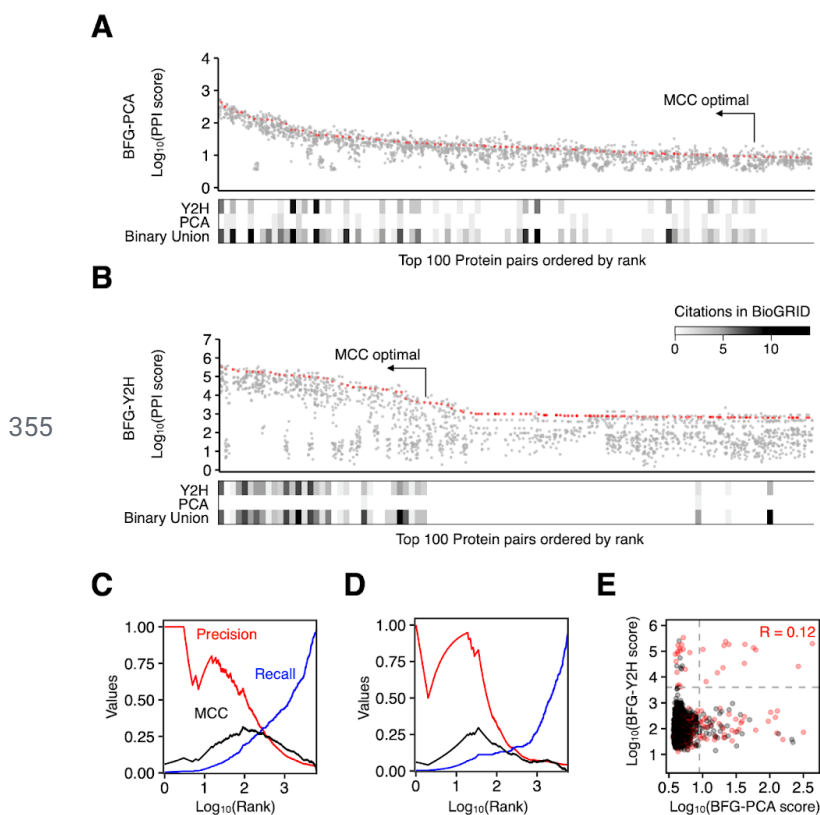

356 **Figure 3. Quality of BFG-PCA and BFG-Y2H screenings.**

357 A. & B. Results of assay ordered by PPI score rank for BFG-PCA (A), and BFG-Y2H (B). Grey  
358 dots represent replicates, and the red dots represent the percentile threshold used to call the  
359 ranks. The heatmap shows previously reported PPIs in the BioGRID database. Binary union  
360 consists of interactions reported by Y2H, PCA, Biochemical activity, Affinity  
361 Capture-Luminescence, Reconstituted Complex, Co-crystal Structure, and FRET.

362 C. & D. Precision, recall, and MCC values for BFG-PCA (C) and BFG-Y2H (D) with a given rank  
 363 threshold.

364 E. Scatter plot between BFG-PCA and BFG-Y2H scores. Red represents PPIs in the BioGRID  
 365 database reported by binary PPI detection methods. Grey dashed lines represent the threshold  
 366 to call positives. R represents Kendall correlation coefficient for previously reported binary  
 367 interactions.

368

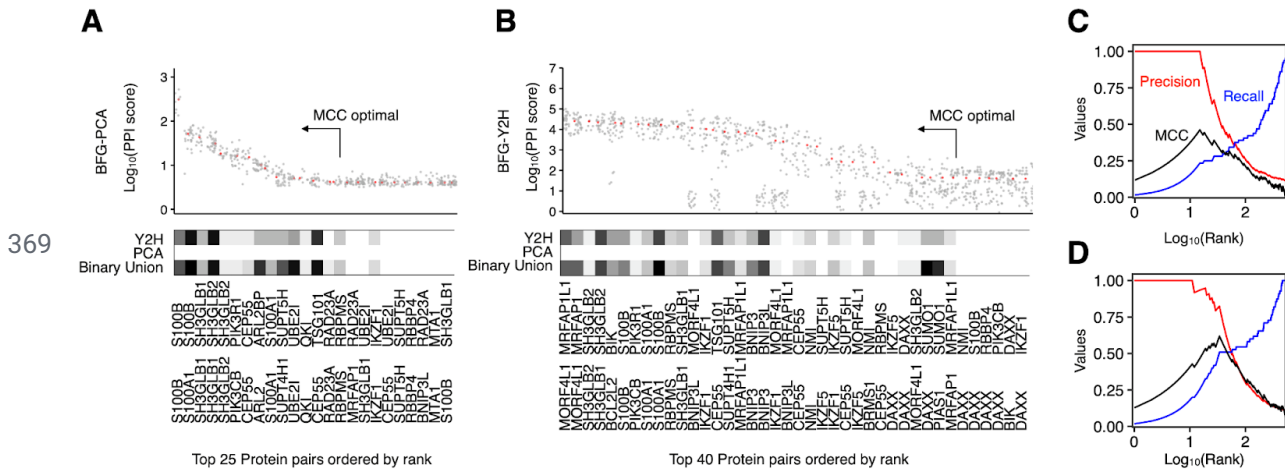

370 **Figure EV3. Detected interactions in the Human protein subset.**

371 A. & B. Result of assay ordered by PPI score rank on the Human proteins for BFG-PCA  
 372 (A)/BFG-Y2H (B). Grey dots represent replicates, and the red dots represent replicates on the  
 373 percentile threshold used to call the ranks. The heatmap shows previously reported interactions  
 374 in the BioGRID database. Binary union consists of interactions reported by Y2H, PCA,  
 375 Biochemical activity, Affinity Capture-Luminescence, Reconstituted Complex, Co-crystal  
 376 Structure, and FRET.

377 C. & D. Precision, recall, and MCC curve for BFG-PCA (C) and BFG-Y2H (D) on Human protein  
 378 pairs.

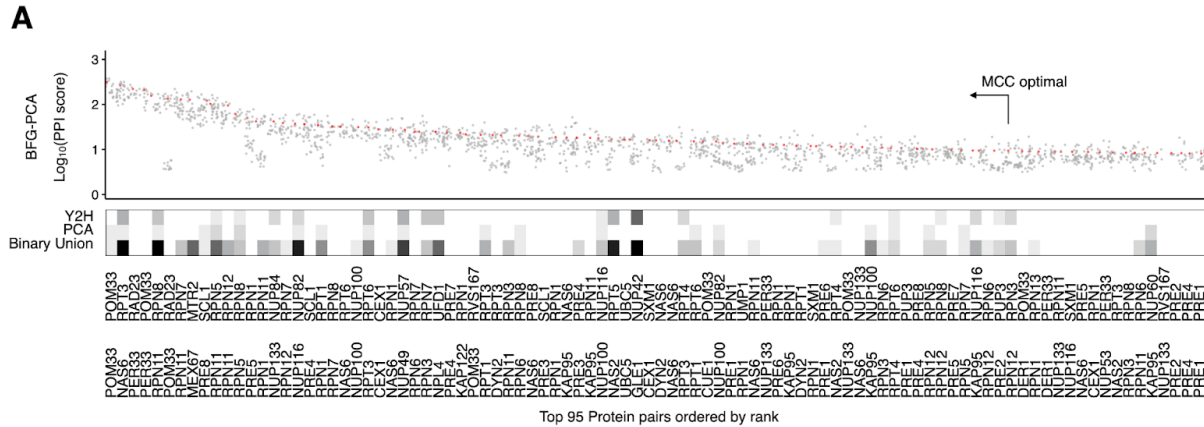

379

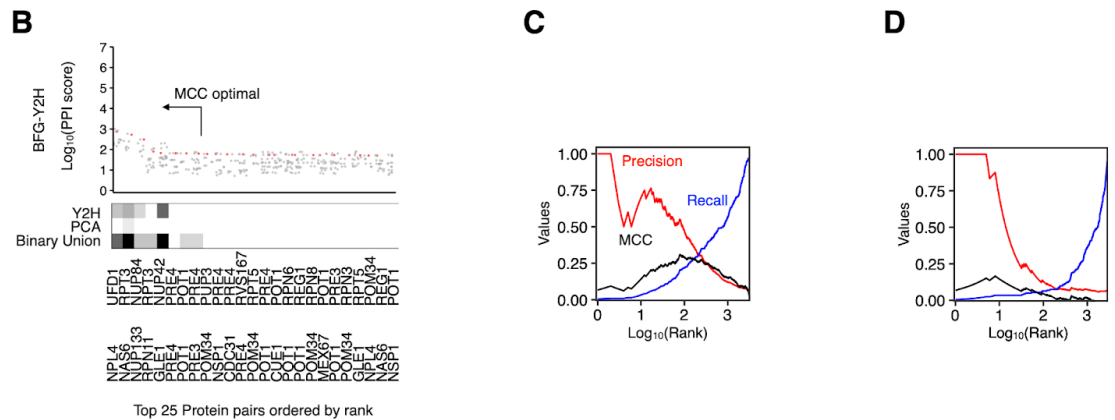

380 **Figure EV4. Detected interactions in the Yeast protein subset.**

381 A. & B. Result of assay ordered by PPI score rank on the Yeast proteins for BFG-PCA  
 382 (A)/BFG-Y2H (B). Grey dots represent replicates, and the red dots represent replicates on the  
 383 percentile threshold used to call the ranks. The heatmap shows previously reported interactions  
 384 in the BioGRID database. Binary union consists of interactions reported by Y2H, PCA,  
 385 Biochemical activity, Affinity Capture-Luminescence, Reconstituted Complex, Co-crystal  
 386 Structure, and FRET.

387 C. & D. Precision, recall, and MCC curve for BFG-PCA (C) and BFG-Y2H (D) on Yeast protein  
 388 pairs.

389

390 **BFG-PCA captured binary PPIs in the 26S proteasome with high resolution**

391 We further investigated whether the quantitative PPI score from BFG-PCA correlates with  
 392 interaction strength. We hypothesized that since all proteins are expressed from the same  
 393 promoter, variation in signal intensity may depend on how proteins interact rather than on their  
 394 expression level. We calculated the solvation free energy gain ( $\Delta G$ ) between subunits in the  
 395 three-dimensional protein interface of crystal structure of the yeast 26S proteasome (Ding et al.  
 396 2019) (PDB: 6J2X). We observed a strong negative correlation between BFG-PCA PPI score



397 and  $\Delta G$  ( $R = -0.58$ ,  $p\text{-value} = 1.44 \times 10^{-8}$ , Pearson correlation) (**Fig 4A**). Among the protein  
398 pairs with BFG-PCA PPI scores above the threshold to call interaction, 6 were unreported using  
399 binary PPI detection methods. We mapped these protein pairs on the crystal structure, and  
400 found that the interactions called by BFG-PCA are indeed neighboring subunits of the 26S  
401 proteasome (**Fig 4B**). These results suggest the potential of BFG-PCA to capture binary PPIs  
402 within protein complexes with high precision.

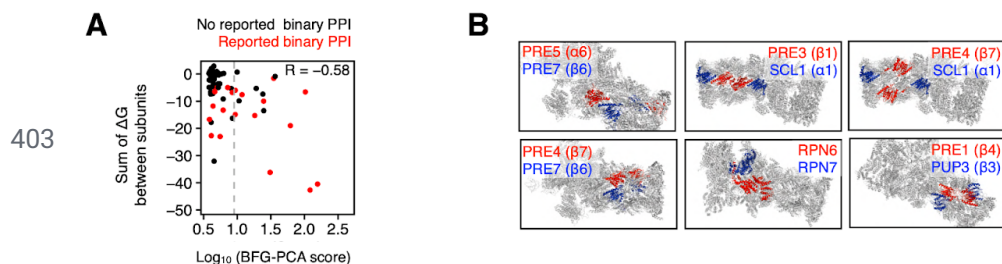

404 **Figure 4. BFG-PCA PPI score agrees with  $\Delta G$  between subunits within the yeast 26S**  
405 **proteasome.**

- 406 A. Scatter plot of BFG-PCA score and solvation free energy gain ( $\Delta G$ ) upon formation of  
407 the interface between subunits. Grey dashed lines represent the threshold to call  
408 positives. Red represents PPIs in the BioGRID database reported by binary PPI  
409 detection methods. R represents Pearson correlation coefficient.
- 410 B. Detected positives with no previous binary PPI reports were mapped on the crystal  
411 structure (PDB:6J2X). Color for each indicated protein is shown within each image.

412

### 413 BFG-PCA compared to genomic integration-based DHFR-PCA

414 Compared to genome-based DHFR-PCA, our plasmid constructs differ in two key components.  
415 First, the standard DHFR-PCA detects PPIs among proteins under native expression levels,  
416 whereas plasmid-based DHFR-PCA and BFG-PCA express the gene under a constitutively  
417 active *ADH1* promoter. Second, while protein-linker-DHFR fusion in previous works generally  
418 used the linker sequence (GGGS)<sub>2</sub>, our plasmid based linker sequence is  
419 NPAFLYKVVGGGSTS. To examine if these differences influence the detection of PPIs, we  
420 compared the interaction scores derived from DHFR-PCA with genomic integration from  
421 previous studies (Tarassov et al. 2008; Chrétien et al. 2018) with BFG-PCA. As expected from  
422 the results reported above, BFG-PCA detected a significant number of known binary  
423 interactions which were not captured by genome-based DHFR-PCA (**Appendix Fig S8A**). The  
424 expression levels of protein (Ho, Baryshnikova, and Brown 2018) with lower values within the  
425 pair (which may serve as a bottleneck for signal) was compared between each section of the  
426 scatter plot that define which PPI is detectable with each method (**Appendix Fig S8B**). The  
427 results showed that PPI negative pairs have significantly lower expression compared to that of  
428 positive pairs, which agrees with previous literature (Grigoriev 2001). Although no significant  
429 difference in protein expression was observed between BFG-PCA specific positives and  
430 Tarassov et al.'s positives, we noticed a case of lowly expressed proteins whose expression is  
431 detectable only by BFG-PCA, Gle1, interacting with Nup42. Gle1 and Nup42 are both subunits  
432 of the nuclear pore complex, and their PPI has been reported to interact by multiple methods in  
433 both low (Murphy and Wentz 1996; Strahm 1999; Alber et al. 2007; Lin et al. 2018; Adams et al.  
434 2018) and high-throughput (H. Yu et al. 2008), but has not been detected by genome-based  
435 DHFR-PCA. The higher expression level or the modified linker or both may allow a better  
436 detection of this PPI.

437

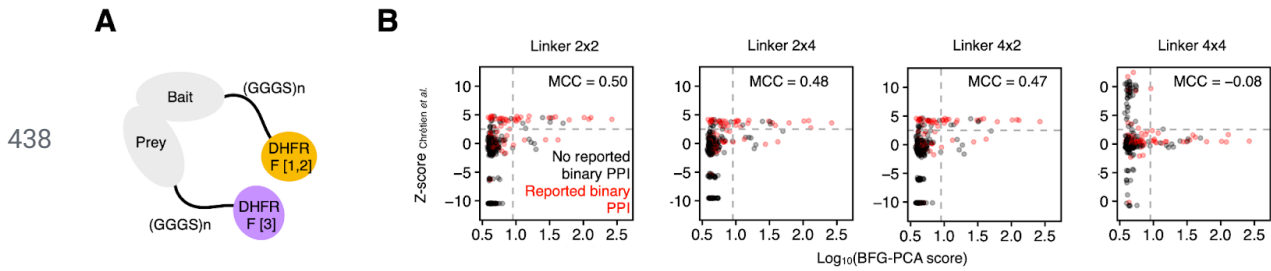

439 **Figure EV5. BFG-PCA scores compared to DHFR-PCA with extended linkers.**

440 A. Illustration of DHFR-PCA linker design. Chrétien et al. detected PPIs with linkers with  
441 (GGGS)<sub>2</sub> or (GGGS)<sub>4</sub> in both bait and prey orientations.

442 B. Scatter plot of BFG-PCA score and Z-score obtained in Chrétien et al. Grey dashed lines  
443 represent the threshold to call positives. Red represents PPIs in the BioGRID database  
444 reported by binary PPI detection methods.

445

446 We investigated whether variation in linker length or composition of polar amino acids affected  
447 the detected PPIs, we compared the BFG-PCA PPI scores to a previous effort of extending the  
448 linker sequence to (GGGS)<sub>4</sub> in genome-based DHFR-PCA (Chrétien et al. 2018), **Fig EV5A**.  
449 Out of the four combinations of linkers they have tested, we observed that the scores obtained  
450 by standard (GGGS)<sub>2</sub> for both DHFR F[1,2] and DHFR F[3] had the best agreement with  
451 BFG-PCA positives (MCC = 0.50), where having an extended linker for either DHFR F[1,2] and  
452 DHFR F[3] slightly decreases the agreement (MCC = 0.48 and 0.47), and having both linkers  
453 extended drastically decreases the agreement (MCC = -0.08, **Fig EV5B**).

454

## 455 Tagging orientation of DHFR fragments modifies the space of detectable 456 PPIs

457 It was previously reported that the DHFR fragment position of fusion protein influences detection  
458 ability (MacDonald et al. 2006; Choi et al. 2019). In the context of the proteasome for instance,  
459 we indeed observed a stronger negative correlation between BFG-PCA PPI scores and the  
460 distance between pairs of C-termini ( $R = -0.41$ ,  $p\text{-value} = 2.04 \times 10^{-14}$ , Pearson correlation) than  
461 the N-termini ( $R = -0.22$ ,  $p\text{-value} = 6.46 \times 10^{-5}$ , Pearson correlation) (**Fig 5A,B**). We therefore  
462 also constructed BFG-PCA plasmids amenable for DHFR N-terminal tagging. We investigated if  
463 the number of detected PPIs can be increased by using a N-terminus fusion version of  
464 DHFR-PCA. We tested interactions for 41 bait-prey pairs by spot assay with the N-terminus  
465 fusion version of plasmid-based DHFR-PCA. As a result, the N-terminus DHFR-PCA captured 7  
466 interactions which the C-terminus tagging BFG-PCA could not capture (**Fig 5C**). Since 5 out of  
467 the 7 were detected by BFG-Y2H (N-terminus tagging), these results suggest that part of the  
468 difference between PCA and Y2H comes from tagging orientation. Another captured interaction  
469 (Rpt5p and Rpt4p) had a BFG-PCA score slightly higher compared to other tested pairs but still  
470 below the threshold to call as positives. Since the distance from C/N-terminus of this pair was  
471 47.841 Å and 9.692 Å on the crystal structure, we suspect that the DHFR reporter reconstitution  
472 needed for cell growth was not sufficient for C-terminus DHFR fusions, but adequate for  
473 N-terminus, showing its potential for further discoveries of binary PPIs.

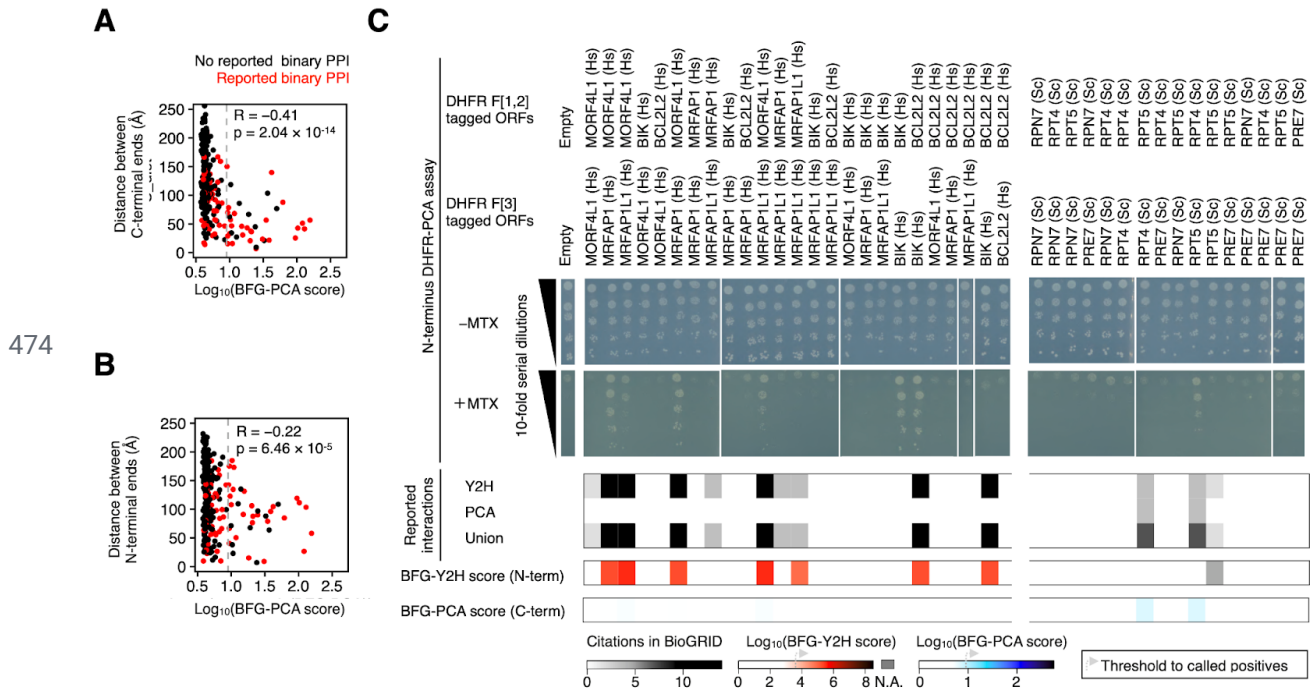

474

475 **Figure 5. N-terminal DHFR-PCA detects BFG-Y2H specific positives.**

476 A,B Scatter plot representation of BFG-PCA PPI score and distance between the most  
477 C-terminal (A) and N-terminal (B) residue of the subunits annotated within the Yeast 26S  
478 proteasome (PDB:6J2X). Red represents PPIs in the BioGRID database reported by binary PPI  
479 detection methods. Grey dashed lines represent the threshold to call positives. R represents  
480 Pearson correlation.

481 C Plasmid based N-terminus DHFR-PCA spot assay results for a subset of interactions  
482 screened in BFG-PCA and BFG-Y2H. Two matrices each having 5 Human proteins, and 4 Yeast  
483 proteins were tested. (Middle) Images from the spot assay. -MTX: Cell viability control without  
484 methotrexate. +MTX: Selection condition for PPI with 200 µg/mL methotrexate. Serial 10-fold  
485 dilution of cells starting at OD<sub>600nm</sub> = 0.5 was plated. (Bottom) Heatmap representation of  
486 reported binary PPIs in the BioGRID database, BFG-Y2H score, and BFG-PCA score. Data for  
487 Rpt5-Rpt5 was not available for BFG-Y2H.

488

489

## 490 Conclusion

491 We developed a toolkit for plasmid based DHFR-PCA that exploits DNA barcode technologies  
492 for pooled screening (BFG-PCA). These tools are ready for systematic binary PPI mapping. We  
493 demonstrated the significance of BFG-PCA by screening >11,000 bait-prey pairs corresponding  
494 to 6,575 unique putative PPIs. We also performed a side-by-side comparison with BFG-Y2H for  
495 quality assessment of the method. Although it has been known that PPIs detected by  
496 DHFR-PCA and Y2H have very little overlap, no systematic comparison of the two methods has  
497 been done using the same expression promoters and the same analytical pipeline. Here, we  
498 showed that BFG-PCA and BFG-Y2H detect distinct sets of PPIs expressed from the same  
499 vector and promoter, confirming their complementarity for binary mapping. We note that  
500 BFG-PCA is significantly better at detecting yeast proteasome and nuclear pore complex related  
501 PPIs. Many reasons could explain these differences, for instance the localization of the fusion  
502 proteins. Y2H domain fused proteins are localized in the nucleus and need to have access to  
503 the chromatin and DNA to activate the expression of the selection marker, which may not  
504 always be possible for Proteasome and Nuclear Pore subunits.

505

506 Previous reports described DHFR-PCA as being able to rescue the growth of cells by having as  
507 little as 25 reconstituted complexes per cell (Remy and Michnick 1999). Since low gene  
508 expression of an interacting partner can limit the number of DHFR reporter reconstitution,  
509 plasmid-based DHFR-PCA can in theory be more sensitive to such protein pairs than genome  
510 integration based methods. However, we found no strong evidence of such increased sensitivity  
511 of BFG-PCA compared to previous genome-based DHFR-PCA datasets in the tested protein  
512 interaction space, with a few exceptions. However, we should take into account the targeted  
513 space (the proteasome and nuclear pore complexes) in this study. It is known for instance that  
514 the subunits in the proteasome are regulated at the post transcriptional level (Ascencio et al.  
515 2021), which means that higher transcription levels from the *ADH1* promoter may not influence  
516 PPIs. Also, subunits of these two protein complexes may be more expressed already than many  
517 other proteins, leaving little room for signal improvement with this promoter. In order to  
518 comprehensively assess the sensitivity of BFG-PCA on low expressed proteins, further  
519 investigation will be needed.

520

521 The C-terminus fusion DHFR-PCA constructs used in the BFG-PCA screening in our work  
522 favoured protein pairs with closer C-terminal ends. By testing N-terminus fusion DHFR-PCA  
523 constructs, we have shown that we can detect PPIs which were not detected in C-terminus  
524 fusion DHFR-PCA. Previously, it has been reported that testing all possible fusion protein  
525 orientation (C-C, C-N, N-C, and N-N fusion of bait and prey) in a nano-luciferase  
526 complementation assay can capture as many PPIs as having multiple orthogonal assays (Choi  
527 et al. 2019). Both C-terminus and N-terminus plasmid based DHFR-PCA presented here can be  
528 used and one would be able to assay all 4 of the protein fusion combinations (C-C, C-N, N-C,  
529 and N-N), increasing the PPIs detected. BFG-PCA screenings for the four fusion combinations  
530 could be performed by the same BFG-PCA haploid yeast strains prepared for C-terminus and  
531 N-terminus BFG-PCA by simply mating them in desired combinations. This enables researchers  
532 to screen PPIs with the additional C-N and N-C combinations without additional cost to prepare  
533 barcoded yeast strains, which require investments in performing BFG screenings.

534

535 In summary, the newly developed plasmid-based pooled DHFR-PCA is a binary PPI detection  
536 method orthogonal to existing assays that can expand the interactome space to be targeted in  
537 yeast but also for any species for which it is possible to clone and expressed ORF in yeast.

## 538 Structured Methods

| Reagent/Resource                                          | Reference or Source  | Identifier or Catalog Number                                                                                                                                                   |
|-----------------------------------------------------------|----------------------|--------------------------------------------------------------------------------------------------------------------------------------------------------------------------------|
| <b>Experimental Models</b>                                |                      |                                                                                                                                                                                |
| Y8800 ( <i>Saccharomyces cerevisiae</i> , MAT $\alpha$ )  | James et al., 1996   | MAT $\alpha$ leu2-3,112 trp1-901 his3-200 ura3-52 gal4 $\Delta$ gal80 $\Delta$ GAL2-ADE2 LYS2::GAL1-HIS3 MET2::GAL7-lacZ cyh2R                                                 |
| Y8930 ( <i>Saccharomyces cerevisiae</i> , MAT $\alpha$ )  | James et al., 1996   | MAT $\alpha$ leu2-3,112 trp1-901 his3-200 ura3-52 gal4 $\Delta$ gal80 $\Delta$ GAL2-ADE2 LYS2::GAL1-HIS3 MET2::GAL7-lacZ cyh2R                                                 |
| RY1010 ( <i>Saccharomyces cerevisiae</i> , MAT $\alpha$ ) | Yachie et al, 2016   | MAT $\alpha$ leu2-3,112 trp1-901 his3-200 ura3-52 gal4 $\Delta$ gal80 $\Delta$ PGAL2-ADE2 LYS2::PGAL1-HIS3 MET2::PGAL7-lacZ cyh2R can1 $\Delta$ ::PCMV-rtTA-KanMX4             |
| RY1030 ( <i>Saccharomyces cerevisiae</i> , MAT $\alpha$ ) | Yachie et al, 2016   | MAT $\alpha$ leu2-3,112 trp1-901 his3-200 ura3-52 gal4 $\Delta$ gal80 $\Delta$ PGAL2-ADE2 LYS2::PGAL1-HIS3 MET2::PGAL7-lacZ cyh2R can1 $\Delta$ ::TADH1-PtetO2-Cre-TCYC1-KanMX |
| YY3094 ( <i>Saccharomyces cerevisiae</i> , MAT $\alpha$ ) | Marchant et al, 2019 | MAT $\alpha$ leu2-3,112 trp1-901 his3-200 ura3-52 gal4 $\Delta$ gal80 $\Delta$ LYS2::PGAL1-HIS3 MET2::PGAL7-lacZ cyh2R can1 $\Delta$ ::PCMV-rtTA-KanMX4                        |
| YY3095 ( <i>Saccharomyces cerevisiae</i> , MAT $\alpha$ ) | Marchant et al, 2019 | MAT $\alpha$ leu2-3,112 trp1-901 his3-200 ura3-52 gal4 $\Delta$ gal80 $\Delta$ LYS2::PGAL1-HIS3 MET2::PGAL7-lacZ cyh2R can1 $\Delta$ ::TADH1-PtetO2-Cre-TCYC1-KanMX            |
| <b>Recombinant DNA</b>                                    |                      |                                                                                                                                                                                |
| pDEST-AD                                                  | Rural et al, 2005    | N/A                                                                                                                                                                            |
| pDEST-DB                                                  | Rural et al, 2005    | N/A                                                                                                                                                                            |
| pDN0501                                                   | Marchant et al, 2019 | N/A                                                                                                                                                                            |
| pDN0502                                                   | Marchant et al, 2019 | N/A                                                                                                                                                                            |
| pDEST-DHFR F[1,2]-C (TRP1)                                | Marchant et al, 2019 | N/A                                                                                                                                                                            |
| pDEST-DHFR F[3]-C (LEU2)                                  | Marchant et al, 2019 | N/A                                                                                                                                                                            |
| pDEST-DHFR F[1,2]-N (TRP1)                                | This study           | N/A                                                                                                                                                                            |
| pDEST-DHFR F[1,2]-N (LEU2)                                | This study           | N/A                                                                                                                                                                            |
| pDEST-DHFR F[3]-N (LEU2)                                  | This study           | N/A                                                                                                                                                                            |
| Barcoded pDEST-AD                                         | This study           | Table EV1.                                                                                                                                                                     |
| Barcoded pDEST-DB                                         | This study           | Table EV1.                                                                                                                                                                     |
| Barcoded pDN0509;pDEST-DHFR F[1,2]-C (TRP1)               | This study           | Table EV1.                                                                                                                                                                     |
| Barcoded pDN0510;pDEST-DHFR F[3]-C (LEU2)                 | This study           | Table EV1.                                                                                                                                                                     |



| <b>Oligonucleotides and sequence-based reagents</b>    |                                                                   |                 |
|--------------------------------------------------------|-------------------------------------------------------------------|-----------------|
| PCR primers and gene fragments                         | Yachie et al, 2016 and this study.                                | Table EV2       |
| <b>Chemicals, enzymes and other reagents</b>           |                                                                   |                 |
| Yeast Nitrogen Base with ammonium sulfate, powder      | MP Biomedicals                                                    | Cat #4027512    |
| Yeast Nitrogen Base without ammonium sulfate, powder   | MP Biomedicals                                                    | Cat #4027112    |
| Amino acid dropout mix                                 | Amberg, Burke, and Strathern, 2005                                | N/A             |
| Doxycycline                                            | Sigma-Aldrich                                                     | Cat #D9891      |
| Methotrexate                                           | Tokyo Chemical Industry                                           | Cat #M1664      |
| Gibson in vitro assembly mix                           | Gibson et al, 2009                                                | N/A             |
| Noble Agar                                             | Sigma-Aldrich                                                     | Cat #A5431      |
| Frozen-EZ Yeast Transformation II Kit                  | Zymo Research                                                     | Cat #T2001      |
| Charge switch Yeast plasmid mini kit                   | Thermo Fisher Scientific                                          | Cat #CS10203    |
| Phusion® High-Fidelity PCR Master Mix with HF Buffer   | NEB                                                               | Cat #M0531S     |
| <b>Software</b>                                        |                                                                   |                 |
| Python version 3.6.1                                   | <a href="http://www.python.org">www.python.org</a>                | N/A             |
| R version 4.0.4                                        | <a href="https://www.r-project.org">https://www.r-project.org</a> | N/A             |
| BLASTn version 2.4.0                                   | Altschul et al, 1990                                              | N/A             |
| PDBePISA version 1.52                                  | Krissinel and Henrick, 2007                                       | N/A             |
| Pymol version 2.5.0                                    | Schrödinger Inc.                                                  | N/A             |
| <b>Other</b>                                           |                                                                   |                 |
| Illumina MiSeq                                         | Illumina                                                          | N/A             |
| Qpix450                                                | Molecular Device                                                  | N/A             |
| Liquidator 96                                          | RAININ                                                            | Cat #LIQ-96-200 |
| Pre-Sterilized Breathable Sealing Film for cell growth | Corning                                                           | Cat #BF-400-S   |

## 540 **Methods and Protocols**

### 541 Plasmid construction

542 For the plasmid-based DHFR-PCA and BFG-PCA, we used Gateway cloning-compatible  
543 plasmid vectors which we previously constructed based on the Y2H plasmids pDEST-AD and  
544 pDEST-DB (Marchant et al. 2019). Plasmid-based DHFR-PCA vectors bearing the DHFR  
545 fragment domain on the N-terminus end of the protein (pDEST-DHFR F[1,2]-N and  
546 pDEST-DHFR F[3]-N) were constructed for this study. To generate pDEST-DHFR F[1,2]-N  
547 (LEU2) and pDEST-DHFR F[3]-N (LEU2), the DB domain of pDN0502 (LEU2) was replaced  
548 with DHFR fragments by ligation. The backbone fragment was prepared by restriction digestion  
549 of pDN0502 using HindIII and NotI and purified by size-selection on gel. The insert DHFR  
550 fragments DEY030 (DHFR F[1,2]) and DEY031 (DHFR F[3]) were ordered as gene fragments  
551 (TWIST biosciences). The fragments were amplified using primers DEY032 and DEY033. The  
552 insert fragments were purified on gel after digestion with HindIII and NotI. The pDN0502  
553 backbone and each of the inserts were used for ligation to generate pDEST-DHFR F[1,2]-N  
554 (LEU2) and pDEST-DHFR F[3]-N (LEU2). To generate pDEST-DHFR F[1,2]-N (TRP1),  
555 pDN0501 and pDEST-DHFR F[1,2]-N (LEU2) were digested with I-CeuI and I-SceI to size select  
556 the backbone and insert, respectively. The two fragments were used for ligation to generate the  
557 pDEST-DHFR F[1,2]-N (TRP1) plasmid. After Gateway LR cloning of entry clones to these  
558 destination plasmids, the expression plasmids encode DHFR-linker-protein fusion protein with  
559 the following linker sequence GGGSTSTSLYKKVG. The plasmids were each confirmed for their  
560 correct construction by Sanger sequencing.

### 561 Construction of Y2H and DHFR plasmids and strains for PPI assay

562 Expression plasmids were generated by subcloning ORF regions of entry plasmids to  
563 destination vectors by Gateway LR reaction (Walhout et al. 2000). In detail, 10 ng each of entry  
564 plasmid and destination plasmid was mixed with Gateway LR clonase II (Invitrogen) in a 2  $\mu$ L  
565 final volume and incubated at 25 °C for at least 16 hours. The entire volume of the enzymatic  
566 reaction was used to transform 25  $\mu$ L of NEB5-alpha chemically competent *E.coli* cells,  
567 prepared as previously described (Swords 2003). The transformation was performed as in  
568 (Dreze et al. 2010) but with selection on LB+ampicillin plates followed by incubation overnight at  
569 37°C instead of direct inoculation to liquid culture. The colonies were scraped and cultured in 5  
570 mL LB+ampicillin for plasmid purification.

## 571 Yeast medium for Y2H and DHFR-PCA assays

572 Haploid and diploid strain cultures of Y2H and PCA samples were cultured in  
573 SC-Leu+Ade+His/SC-Trp+Ade+His and SC-Leu-Trp+Ade+His, respectively. Mating was  
574 performed in YPAD medium. For Y2H selection, the control condition was on SC-Leu-Trp+0.18  
575 mg /mL Ade+8 mM His plates, and selection conditions was on SC-Leu-Trp-His+0.18 mg/mL  
576 Ade and SC-Leu-Trp-His+ 0.18 mg /mL Ade+ 1 mM amino-1,2,4-triazole (3-AT). Preparation  
577 was carried out as previously described (Dreze et al. 2010), and shown in **Appendix Note S2**.  
578 The amino acid dropout mix (DO mix) was prepared as previously described (Amberg, Burke,  
579 and Strathern 2005).

580 For DHFR-PCA and BFG-PCA screenings, methotrexate (MTX) (Tokyo Chemical Industry co.,  
581 ltd.) was dissolved in 20 mL of DMSO according to the final concentration. The control condition  
582 was SC-Leu-Trp-Ade+8 mM His+2.0 % (v/v) DMSO, and default selection was  
583 SC-Leu-Trp-Ade+8 mM His+2.0 % (v/v) DMSO+ 200 µg/mL methotrexate. Preparation was  
584 carried out as previously described (Tarassov et al. 2008; Rochette et al. 2015), and shown in  
585 **Appendix Note S2**. The 10× DO mix solution was prepared by dissolving 15 g of the powder  
586 DO mix in deionized water, and filtered for sterilization.

## 587 DHFR-PCA spot and pintool assays

588 The purified pDHFR F[1,2]-ORF and pDHFR F[3] expression plasmids were used to transform  
589 stains YY3094 and YY3095, respectively. The pDHFR F[3]-ORF (bait) and pDHFR F[1,2]-ORF  
590 (prey) transformants were respectively selected on SC-Leu+Ade+His or SC-Trp+Ade+His  
591 plates at 30 °C for 48 hours. The resulting haploid bait and prey strains were pre-cultured  
592 individually in 96-well plates with 200 µL of media and incubated at 30 °C for 2 overnights.  
593 SC-Leu+Ade+His and SC-Trp+Ade+His media were used to culture bait and prey strains,  
594 respectively. The haploid strains were mated by spotting 5 µl each of the bait and prey culture  
595 for all protein pair combinations on YPAD plates and incubated overnight at 30 °C for mating.  
596 The mated samples were inoculated to 1 mL of SC-Leu-Trp+Ade+His liquid medium in a deep  
597 96-well plate, and diploid cells were selected by incubation at 30 °C with 200 rpm agitation  
598 overnight. The resulting diploid culture was centrifuged at 500×g and resuspended in  
599 autoclaved Millipore quality H<sub>2</sub>O twice and subjected to OD<sub>600</sub> measurement. For selection, the  
600 samples were spotted at OD<sub>600</sub> = 0.5 at a volume of 5 µl on 3.0% (w/v) agar plates of  
601 SC-Ade-Leu-Trp+2% (v/v) DMSO (-MTX), and SC-Ade-Leu-Trp+2% (v/v) DMSO + 200

602  $\mu\text{g}/\text{mL}$  methotrexate (+MTX). The selection plates were incubated for 72 hours at 30 °C for  
603 growth scoring, and further incubated at 30 °C and observed every 24 hours.

604 The pintool assay was performed using the generated DHFR-PCA strains based on previously  
605 described standard procedures (Rochette et al. 2015; Tarassov et al. 2008).

## 606 Barcode Fusion assay

607 Barcoded plasmids were transformed each into Y2H (Y8800 and Y8930), BFG-Y2H (RY1010  
608 and RY1030), and BFG-PCA (YY3094 and YY3095) strains, mated, and selected for diploid as  
609 above. The diploid samples were subjected to doxycycline induction after adjusting  $\text{OD}_{600\text{nm}}$  to  
610 1.0 in 2.5mL of SC-Leu-Trp+Ade+10  $\mu\text{g}/\text{mL}$  doxycycline, and incubated 30 °C in rotation for one  
611 overnight until the  $\text{OD}_{600\text{nm}}$  reached 5.0. The samples were lysed as previously described  
612 (Lööke, Kristjuhan, and Kristjuhan 2011), and genotyping PCR was performed with conditions  
613 as in Yachie *et al* (Yachie et al. 2016).

## 614 Selection of ORFs used in this study

615 Positive controls were picked based on known Y2H interactions reported in the BioGRID  
616 database and retrieved from the CCSB human ORFeome resource (Rual et al. 2005). Nuclear  
617 pore complex (NPC) and proteasome related proteins were searched in the Uniprot (UniProt  
618 Consortium 2021) using keywords, “nuclear pore complex” and “proteasome”, respectively.  
619 Among the list, we accessed clones available from the *S.cerevisiae* Movable ORF collection  
620 (Gelperin et al. 2005), and quality controlled by Sanger sequencing using primer DEY034. The  
621 complete list of selected ORFs are shown in **Table EV3**.

## 622 Generation of barcoded Y2H and DHFR-PCA destination plasmid libraries

623 In total, 1,867 barcoded Y2H destination plasmids (1,137 for pDEST-AD and 730 for  
624 pDEST-DB) were generated as in (Yachie et al., 2016). Briefly, two PCR products each having a  
625 random 25-bp flanked by lox sites and overlapping sequences were integrated into the SacI site  
626 of pDEST-AD or pDEST-DB via *in vitro* DNA assembly (Gibson et al. 2009). This barcoded  
627 destination vector pool was transformed into One Shot ccdB Survival 2 T1<sup>R</sup> Competent Cells  
628 (Invitrogen) that were spread on 245 mm × 245 mm square LB+ampicillin plates and incubated  
629 overnight at 37°C for colony isolation. Single colonies were picked by the QPix 450 robot  
630 (Molecular Device) and arrayed into a 384-well format. Two Row Column Plate-PCRs

631 (RCP-PCRs) (Yachie et al. 2016) were performed to identify clonal samples with their barcode  
632 sequences (BC-RCP-PCR) and to check the integrity of loxP and lox2272 sequences  
633 (Lox-RCP-PCR). RCP-PCR samples were multiplexed with other libraries, and sequenced on  
634 an Illumina MiSeq (2×250 bp paired-end sequencing). Pair of barcodes that had less than 5 %  
635 abundance within the well were eliminated to cancel out sequencing errors. The quality criteria  
636 was set so that only wells containing a single pair of barcode sequences with the designed  
637 elements were used for downstream processes.

638 The barcoded DHFR-PCA destination plasmids were generated similarly using destination  
639 plasmids pDEST-DHFR F[1,2]-C (TRP1) and pDEST-DHFR F[3]-C (LEU2). In total, 1,483  
640 barcoded DHFR-PCA destination plasmids (893 for pDEST-DHFR F[1,2]-C and 590 for  
641 pDEST-DHFR F[3]-C) were generated. The destination vectors were digested with PI-PspI, and  
642 the two PCR products with random barcodes were inserted via *in vitro* DNA assembly (Gibson  
643 et al. 2009). The PCR primers to generate the barcodes were altered from that of BFG-Y2H due  
644 to change in insert site. The primers used here are shown in **Table EV2**. The isolated bacterial  
645 colonies having barcoded destination vectors were prepared in the same manner as Y2H  
646 destination vectors. Two RCP-PCR were performed with the same design as in Y2H, but with  
647 minor modification in the primer used for Lox-RCP-PCR (**Table EV2**). The list of prepared  
648 barcodes are shown in **Table EV3**.

#### 649 BFG-Y2H and BFG-PCA ready yeast strain generation

650 Barcoded expression plasmids with defined ORF-barcode associations were generated by  
651 one-by-one Gateway cloning. Similar to the non-barcoded expression vector preparation, ORF  
652 regions of entry plasmids were subcloned by Gateway LR cloning to a mix of 2 pre-assigned  
653 uniquely barcoded destination vectors. In detail, 10 ng of each entry plasmid and destination  
654 plasmid was mixed with Gateway LR clonase II (Invitrogen) in a 4 µL volume and incubated at  
655 25 °C for at least 16 hours. Transformation of LR samples was performed in the same manner  
656 as non-barcoded samples. More than 5 colonies were scraped per sample to ensure  
657 representation of both barcodes, and cultured in 5 mL LB+ampicillin for plasmid purification.  
658 Purified plasmid was used to transform corresponding strains with appropriate selection  
659 medium. All prepared strains are listed in **Table EV3**.

## 660 BFG-Y2H and BFG-PCA screenings

661 Haploid bait and prey strains were cultured to saturation by incubating at 30 °C in a static  
662 manner for approximately 60 hours in a 96-well deep well plate sealed with a breathable seal  
663 (Corning, BF-400-S). Each well contained 1 mL of SC–Leu+Ade+His or SC–Trp+Ade+His liquid  
664 media depending on the plasmids. Strains were pooled (AD,DB, DHFR F[1,2], or DHFR F[3]) by  
665 mixing 1 mL of 2 OD<sub>600nm</sub> equivalent cells for each strain. For mating, two groups of cell pools  
666 were mixed at equal amounts, and incubated at room temperature for 3 hours. After the  
667 incubation, the sample was spun down at 500×g for 4 minutes and then the cell pellet was  
668 spread on a YPAD plate. The plate was incubated at room temperature for 16 hours. The mated  
669 sample was scraped with autoclaved Millipore quality H<sub>2</sub>O, and then washed twice by spinning  
670 down the sample at 500×g for 4 minutes, and resuspending in SC–Leu–Trp+Ade liquid medium.  
671 The diploid cells were selected at a starting OD<sub>600nm</sub> of 1.0 in a 2 L flask containing 500 mL of  
672 SC–Leu–Trp+Ade liquid medium, and incubated for two overnights at 30 °C, 160 rpm. Fifty mL  
673 of the diploid selected culture sample was spun down, and washed twice with water. The  
674 screening was performed by plating an equivalent of 1 mL of 5.0 OD<sub>600nm</sub> cells per plate on 15  
675 plates for each selection condition tested. The number of samples plated for selection was  
676 determined by a Monte-Carlo simulation model described in Yachie *et al* to ensure 100% of the  
677 positive diploid strain having at least 100 cells passing to the following step. The selected  
678 samples were collected after 72 hours of incubation at 30 °C. The collected samples was  
679 subjected to doxycycline induction after adjusting OD<sub>600nm</sub> to 1.0 in 25mL of SC-Leu-Trp+Ade+10  
680 µg/mL doxycycline, and incubated 30 °C for one overnight until the OD<sub>600nm</sub> reached 5.0. The  
681 DNA extraction and deep sequencing library preparation was performed according to  
682 procedures shown in Yachie *et al*. Deep sequencing libraries were multiplexed with other  
683 libraries, and sequenced by Illumina MiSeq (2×250 bp paired-end sequencing). Reads were  
684 demultiplexed and fused DNA barcodes were counted by alignment of primer sequences and  
685 DNA barcodes using BLASTn version 2.4.0 (Altschul et al. 1990) with the blastn-short option  
686 and an E-value threshold of 1e-10.

## 687 BFG-Y2H and BFG-PCA data normalization

688 Both data normalization for BFG-Y2H and BFG-PCA data was performed with custom Python  
689 scripts. For BFG-Y2H data normalization, the procedures followed the method previously  
690 described (Yachie et al. 2016). The detailed procedure for normalizing BFG-PCA data is  
691 described below.

692 For each condition and barcode fusion type (BC1-BC1 or BC2-BC2 fusion), the relative  
693 abundance of each diploid strain was estimated from the aggregated barcode count data. Note  
694 that a constant value of 1 was added to the barcode count of each strain to reduce noise for  
695 smaller values. For the non-selective (control) condition, all diploid strains are expected to grow,  
696 which results in high sequence complexity. Given that the deep sequencing depth is limited for  
697 the entire dynamic range of this complex pool, we first estimate the relative abundance  
698 computed as frequency for each  $Bait_i$  or  $Prey_j$  amongst all diploid strains  $Dip_{ij}$  as

$$699 \quad F_i^{control} = \frac{\sum C_i^{control}}{\sum C_{ij}^{control}} \quad \text{and} \quad F_j^{control} = \frac{\sum C_j^{control}}{\sum C_{ij}^{control}}$$

700 where  $C$  is the sequencing read count within each condition or barcode fusion type,  
701 respectively. Since chances for mating of each haploid combination is dependent on the  
702 relative abundance of each haploid strain, the frequency of diploid  $Dip_{ij}$  (having  $Bait_i$  and  $Prey_j$ )  
703 in non-selection condition ( $F_{ij}^{control}$ ) can be estimated as

$$704 \quad F_{ij}^{control} = F_i^{control} \times F_j^{control}$$

705 Relative growth of diploid in selection condition  $F_{ij}^{selection}$  was directly computed from raw count  
706 data as

$$707 \quad F_{ij}^{selection} = \frac{C_{ij}^{selection}}{\sum C_{ij}^{selection}}$$

708 due to the sparse nature of PPI positives.

709 Based on relative abundance on non-selective and selective conditions, enrichment signal  $s$   
710 was computed as

$$711 \quad s_{ij} = \frac{F_{ij}^{selection}}{F_{ij}^{control}}$$

712 where  $s$  represents a degree of growth enrichment in favor of the selective condition for each  
713 diploid strain.

714 Similar to the BFG-Y2H data, we observed different background levels of  $s$  for each haploid  
715 strain in BFG-PCA. We defined the background as the median of all  $s$  values for each haploid.  
716 The normalized score  $ds$  was computed for each diploid as

$$717 \quad ds_{ij} = \frac{s_{ij}+1}{\{median(s_i)+1\} \times \{median(s_j)+1\}}$$

718 and subjected to PPI calling and analysis.

## 719 PPI analysis

720 PPI analysis was performed by first aggregating all PPI scores for each protein pair, combining  
721 replicates and both bait-prey orientations tested. For each protein pair, PPI scores were sorted,  
722 and various percentiles (1, 5, 10, 15, 20, ... 90, 95, 99), average, and median values were  
723 calculated. We scored protein pairs based on each of the scoring methods (average, median,  
724 and each of the percentiles). Based on each scoring method, the protein pairs were sorted from  
725 highest to lowest, and subjected to computing Matthews Correlation Coefficient (MCC)  
726 (Matthews 1975) against the BioGRID database (version 4.4.198) (Stark et al. 2006) for quality  
727 assessment. We defined all PPIs reported in BioGRID by binary PPI detection methods (Y2H,  
728 PCA, Biochemical activity, Affinity Capture-Luminescence, Reconstituted Complex, Co-crystal  
729 Structure, and FRET) as positives, and categorized true positives (TP), true negatives (TN),  
730 false positives (FP), and false negatives (FN) for each rank threshold. The MCC for each rank  
731 threshold was computed as

$$732 \quad MCC = \frac{(TP \times TN) - (FP \times FN)}{\sqrt{(TP+FP) \times (TP+FN) \times (TN+FP) \times (TN+FN)}}$$

733 , and we defined the optimal threshold to call positives when the MCC value scored the highest.

## 734 Crystal structure analysis

735 The crystal structure data of the yeast 26S proteasome (Ding et al. 2019) (PDB: 6J2X) was  
736 used to calculate solvent free energy between each subunit using PDBePISA (Krissinel and  
737 Henrick 2007). The solvent free energy values were summed when multiple protein chains were  
738 available for the subunits. Kendall rank correlation was used for the statistical test. Distances  
739 from the C/N-terminal ends of the subunits were computed using the `get_distance` function  
740 of Pymol version 2.5.0 (Schrödinger, Inc.). The closest residue to the terminal ends available on  
741 the crystal structure was used. We adopted the closest values among subunits by considering  
742 only the  $\alpha$  and  $\beta$  rings closer to the lid particle. Pearson correlation was used to compute the  
743 coefficient.

## 744 Method comparison analysis

745 Comparison analysis of the detected PPIs were carried out against previous genomic  
746 integration based DHFR-PCA (Tarassov et al. 2008; Chrétien et al. 2018). For the protein pairs  
747 present in both BFG-PCA dataset and Tarassov *et al*, the best performing scoring method and  
748 average score of replicates were extracted from each dataset. Protein expression analysis was



749 performed using protein abundance data (Ho, Baryshnikova, and Brown 2018). For each protein  
750 pair we considered the lowest expression of the pair because it is likely the limiting partner in  
751 complex formation. Mann-Whitney U-test was used for statistical tests.

## 752 Resource availability

753 The DHFR-PCA plasmids for both C-terminus fusion and N-terminus fusion will be available at  
754 Addgene. The barcoded BFG-Y2H and BFG-PCA destination plasmids will also be available at  
755 Addgene.

## 756 Acknowledgements

757 CRL holds the Canada Research Chair in Cellular Systems and Synthetic Biology. NY holds the  
758 Canada Research Chair in Synthetic Biology. This work was funded by Canadian Institutes of  
759 Health Research Foundation grant 387697 (to CRL) and the Japan Society for the Promotion of  
760 Science (JSPS) 18H02428, the Daiichi Sankyo Foundation of Life Science, the Ube Foundation,  
761 and the Astellas Foundation for Research on Metabolic Disorders (to NY). DEY was supported  
762 by a DC1 Fellowship from JSPS, a Graduate Fellowship for Young Leaders from the Sylff  
763 association, TTCK Fellowship, Taikichiro Mori Memorial Research Grant, and the Yamagishi  
764 Student Project Support Program of Keio University.

## 765 Author contributions

766 DEY and NY conceived and designed the study. NY and CRL designed and supervised the  
767 study. DEY, HM, and AKD performed the high-density plate DHFR-PCA assay experiments with  
768 computational analysis by PD and DA. DEY and PN performed the experiments to optimize the  
769 BFG-PCA screening condition. DEY, FDR, and KM performed the BFG-PCA and BFG-Y2H  
770 screenings with support from MS. DEY and YL performed the N-terminus DHFR-PCA assay  
771 experiment. DEY performed the data analysis. DEY and CRL wrote the manuscript and all  
772 authors revised and approved the manuscript.

## 773 Conflict of interest

774 None declared.

775

## 776 References

- 777 Adams, Rebecca L., Aaron C. Mason, Laura Glass, Aditi, and Susan R. Wentz. 2018.  
778 "Correction to: Nup42 and IP6 Coordinate Gle1 Stimulation of Dbp5/DDX19B for mRNA  
779 Export in Yeast and Human Cells." *Traffic* 19 (8): 650.
- 780 Aebersold, Ruedi, Jeffrey N. Agar, I. Jonathan Amster, Mark S. Baker, Carolyn R. Bertozzi,  
781 Emily S. Boja, Catherine E. Costello, et al. 2018. "How Many Human Proteoforms Are  
782 There?" *Nature Chemical Biology* 14 (3): 206–14.
- 783 Alber, Frank, Svetlana Dokudovskaya, Liesbeth M. Veenhoff, Wenzhu Zhang, Julia Kipper,  
784 Damien Devos, Adisetyantari Suprpto, et al. 2007. "Determining the Architectures of  
785 Macromolecular Assemblies." *Nature* 450 (7170): 683–94.
- 786 Alberts, Bruce. 1998. "The Cell as a Collection Overview of Protein Machines: Preparing the  
787 next Generation of Molecular Biologists." *Cell* 92: 291–94.
- 788 Altschul, Stephen F., Warren Gish, Webb Miller, Eugene W. Myers, and David J. Lipman. 1990.  
789 "Basic Local Alignment Search Tool." *Journal of Molecular Biology*.  
790 [https://doi.org/10.1016/s0022-2836\(05\)80360-2](https://doi.org/10.1016/s0022-2836(05)80360-2).
- 791 Amberg, David C., Dan Burke, and Jeffrey N. Strathern. 2005. *Methods in Yeast Genetics: A*  
792 *Cold Spring Harbor Laboratory Course Manual*. CSHL Press.
- 793 Arabidopsis Interactome Mapping Consortium. 2011. "Evidence for Network Evolution in an  
794 Arabidopsis Interactome Map." *Science* 333 (6042): 601–7.
- 795 Ascencio, Diana, Guillaume Diss, Isabelle Gagnon-Arsenault, Alexandre K. Dubé, Alexander  
796 DeLuna, and Christian R. Landry. 2021. "Expression Attenuation as a Mechanism of  
797 Robustness against Gene Duplication." *Proceedings of the National Academy of Sciences*  
798 *of the United States of America* 118 (6). <https://doi.org/10.1073/pnas.2014345118>.
- 799 Braun, Pascal, Murat Tasan, Matija Dreze, Miriam Barrios-Rodiles, Irma Lemmens, Haiyuan Yu,  
800 Julie M. Sahalie, et al. 2009. "An Experimentally Derived Confidence Score for Binary  
801 Protein-Protein Interactions." *Nature Methods* 6 (1): 91–97.
- 802 Bruce, James E. 2012. "In Vivo Protein Complex Topologies: Sights through a Cross-Linking  
803 Lens." *Proteomics* 12 (10): 1565–75.
- 804 Buntru, Alexander, Philipp Trepte, Konrad Klockmeier, Sigrid Schnoegl, and Erich E. Wanker.  
805 2016. "Current Approaches Toward Quantitative Mapping of the Interactome." *Frontiers in*  
806 *Genetics*. <https://doi.org/10.3389/fgene.2016.00074>.
- 807 Celaj, Albi, Ulrich Schlecht, Justin D. Smith, Weihong Xu, Sundari Suresh, Molly Miranda, Ana  
808 Maria Aparicio, et al. 2017. "Quantitative Analysis of Protein Interaction Network Dynamics  
809 in Yeast." *Molecular Systems Biology* 13 (7): 934.
- 810 Choi, Soon Gang, Julien Olivet, Patricia Cassonnet, Pierre-Olivier Vidalain, Katja Luck, Luke  
811 Lambourne, Kerstin Spirohn, et al. 2019. "Maximizing Binary Interactome Mapping with a  
812 Minimal Number of Assays." *Nature Communications* 10 (1): 3907.
- 813 Chrétien, Andrée-Ève, Isabelle Gagnon-Arsenault, Alexandre K. Dubé, Xavier Barbeau, Philippe  
814 C. Després, Claudine Lamothe, Anne-Marie Dion-Côté, Patrick Lagüe, and Christian R.  
815 Landry. 2018. "Extended Linkers Improve the Detection of Protein-Protein Interactions  
816 (PPIs) by Dihydrofolate Reductase Protein-Fragment Complementation Assay (DHFR PCA)  
817 in Living Cells." *Molecular & Cellular Proteomics*. <https://doi.org/10.1074/mcp.a117.000385>.
- 818 Corominas, Roser, Xiping Yang, Guan Ning Lin, Shuli Kang, Yun Shen, Lila Ghamsari, Martin  
819 Broly, et al. 2014. "Protein Interaction Network of Alternatively Spliced Isoforms from Brain  
820 Links Genetic Risk Factors for Autism." *Nature Communications* 5 (April): 3650.
- 821 Ding, Zhanyu, Cong Xu, Indrajit Sahu, Yifan Wang, Zhenglin Fu, Min Huang, Catherine C. L.  
822 Wong, Michael H. Glickman, and Yao Cong. 2019. "Structural Snapshots of 26S  
823 Proteasome Reveal Tetraubiquitin-Induced Conformations." *Molecular Cell* 73 (6):  
824 1150–61.e6.

- 825 Dreze, Matija, Dario Monachello, Claire Lurin, Michael E. Cusick, David E. Hill, Marc Vidal, and  
826 Pascal Braun. 2010. "High-Quality Binary Interactome Mapping." *Methods in Enzymology*  
827 470 (March): 281–315.
- 828 Fields, S., and O. Song. 1989. "A Novel Genetic System to Detect Protein-Protein Interactions."  
829 *Nature* 340 (6230): 245–46.
- 830 Gelperin, Daniel M., Michael A. White, Martha L. Wilkinson, Yoshiko Kon, Li A. Kung, Kevin J.  
831 Wise, Nelson Lopez-Hoyo, et al. 2005. "Biochemical and Genetic Analysis of the Yeast  
832 Proteome with a Movable ORF Collection." *Genes & Development* 19 (23): 2816–26.
- 833 Gibson, Daniel G., Lei Young, Ray-Yuan Chuang, J. Craig Venter, Clyde A. Hutchison 3rd, and  
834 Hamilton O. Smith. 2009. "Enzymatic Assembly of DNA Molecules up to Several Hundred  
835 Kilobases." *Nature Methods* 6 (5): 343–45.
- 836 Gillet, Ludovic C., Pedro Navarro, Stephen Tate, Hannes Röst, Nathalie Selevsek, Lukas Reiter,  
837 Ron Bonner, and Ruedi Aebersold. 2012. "Targeted Data Extraction of the MS/MS Spectra  
838 Generated by Data-Independent Acquisition: A New Concept for Consistent and Accurate  
839 Proteome Analysis." *Molecular & Cellular Proteomics: MCP* 11 (6): O111.016717.
- 840 Go, Christopher D., James D. R. Knight, Archita Rajasekharan, Bhavisha Rathod, Geoffrey G.  
841 Hesketh, Kento T. Abe, Ji-Young Youn, et al. 2021. "A Proximity-Dependent Biotinylation  
842 Map of a Human Cell." *Nature* 595 (7865): 120–24.
- 843 Grigoriev, A. 2001. "A Relationship between Gene Expression and Protein Interactions on the  
844 Proteome Scale: Analysis of the Bacteriophage T7 and the Yeast *Saccharomyces*  
845 *Cerevisiae*." *Nucleic Acids Research* 29 (17): 3513–19.
- 846 Ho, Brandon, Anastasia Baryshnikova, and Grant W. Brown. 2018. "Unification of Protein  
847 Abundance Datasets Yields a Quantitative *Saccharomyces Cerevisiae* Proteome." *Cell*  
848 *Systems* 6 (2): 192–205.e3.
- 849 Hu, Chang-Deng, Yurii Chinenov, and Tom K. Kerppola. 2002. "Visualization of Interactions  
850 among bZIP and Rel Family Proteins in Living Cells Using Bimolecular Fluorescence  
851 Complementation." *Molecular Cell* 9 (4): 789–98.
- 852 Krissinel, Evgeny, and Kim Henrick. 2007. "Inference of Macromolecular Assemblies from  
853 Crystalline State." *Journal of Molecular Biology* 372 (3): 774–97.
- 854 Kristensen, Anders R., Joerg Gsponer, and Leonard J. Foster. 2012. "A High-Throughput  
855 Approach for Measuring Temporal Changes in the Interactome." *Nature Methods* 9 (9):  
856 907–9.
- 857 Lin, Daniel H., Ana R. Correia, Sarah W. Cai, Ferdinand M. Huber, Claudia A. Jette, and André  
858 Hoelz. 2018. "Structural and Functional Analysis of mRNA Export Regulation by the  
859 Nuclear Pore Complex." *Nature Communications* 9 (1): 2319.
- 860 Li, Siming, Christopher M. Armstrong, Nicolas Bertin, Hui Ge, Stuart Milstein, Mike Boxem,  
861 Pierre-Olivier Vidalain, et al. 2004. "A Map of the Interactome Network of the Metazoan *C.*  
862 *Elegans*." *Science* 303 (5657): 540–43.
- 863 Liu, Zhimin, Darach Miller, Fangfei Li, Xianan Liu, and Sasha F. Levy. 2020. "A Large Accessory  
864 Protein Interactome Is Rewired across Environments." *eLife* 9 (September).  
865 <https://doi.org/10.7554/eLife.62365>.
- 866 Lööke, Marko, Kersti Kristjuhan, and Arnold Kristjuhan. 2011. "Extraction of Genomic DNA from  
867 Yeasts for PCR-Based Applications." *BioTechniques* 50 (5): 325–28.
- 868 Luck, Katja, Dae-Kyum Kim, Luke Lambourne, Kerstin Spirohn, Bridget E. Begg, Wenting Bian,  
869 Ruth Brignall, et al. 2020. "A Reference Map of the Human Binary Protein Interactome."  
870 *Nature* 580 (7803): 402–8.
- 871 MacDonald, Marnie L., Jane Lamerdin, Stephen Owens, Brigitte H. Keon, Graham K. Bilter,  
872 Zhidi Shang, Zhengping Huang, et al. 2006. "Identifying off-Target Effects and Hidden  
873 Phenotypes of Drugs in Human Cells." *Nature Chemical Biology*.  
874 <https://doi.org/10.1038/nchembio790>.
- 875 Marchant, Axelle, Angel F. Cisneros, Alexandre K. Dubé, Isabelle Gagnon-Arsenault, Diana

- 876 Ascencio, Honey Jain, Simon Aubé, et al. 2019. “The Role of Structural Pleiotropy and  
877 Regulatory Evolution in the Retention of Heteromers of Paralogs.” *eLife* 8 (August).  
878 <https://doi.org/10.7554/eLife.46754>.
- 879 Matthews, B. W. 1975. “Comparison of the Predicted and Observed Secondary Structure of T4  
880 Phage Lysozyme.” *Biochimica et Biophysica Acta* 405 (2): 442–51.
- 881 Murphy, R., and S. R. Wentz. 1996. “An RNA-Export Mediator with an Essential Nuclear Export  
882 Signal.” *Nature* 383 (6598): 357–60.
- 883 Rajagopala, Seesandra V., Patricia Sikorski, Ashwani Kumar, Roberto Mosca, James Vlasblom,  
884 Roland Arnold, Jonathan Franca-Koh, et al. 2014. “The Binary Protein-Protein Interaction  
885 Landscape of *Escherichia Coli*.” *Nature Biotechnology* 32 (3): 285–90.
- 886 Remy, I., and S. W. Michnick. 1999. “Clonal Selection and in Vivo Quantitation of Protein  
887 Interactions with Protein-Fragment Complementation Assays.” *Proceedings of the National  
888 Academy of Sciences of the United States of America* 96 (10): 5394–99.
- 889 Ren, Ling, Daryl Emery, Barbara Kaboord, Edith Chang, and M. Walid Qoronfleh. 2003.  
890 “Improved Immunomatrix Methods to Detect Protein:protein Interactions.” *Journal of  
891 Biochemical and Biophysical Methods*. [https://doi.org/10.1016/s0165-022x\(03\)00105-2](https://doi.org/10.1016/s0165-022x(03)00105-2).
- 892 Rhee, Hyun-Woo, Peng Zou, Namrata D. Udeshi, Jeffrey D. Martell, Vamsi K. Mootha, Steven  
893 A. Carr, and Alice Y. Ting. 2013. “Proteomic Mapping of Mitochondria in Living Cells via  
894 Spatially Restricted Enzymatic Tagging.” *Science* 339 (6125): 1328–31.
- 895 Rigaut, G., A. Shevchenko, B. Rutz, M. Wilm, M. Mann, and B. Séraphin. 1999. “A Generic  
896 Protein Purification Method for Protein Complex Characterization and Proteome  
897 Exploration.” *Nature Biotechnology* 17 (10): 1030–32.
- 898 Rochette, Samuel, Guillaume Diss, Marie Filteau, Jean-Baptiste Leducq, Alexandre K. Dubé,  
899 and Christian R. Landry. 2015. “Genome-Wide Protein-Protein Interaction Screening by  
900 Protein-Fragment Complementation Assay (PCA) in Living Cells.” *Journal of Visualized  
901 Experiments: JoVE*, no. 97 (March). <https://doi.org/10.3791/52255>.
- 902 Rolland, Thomas, Murat Taşan, Benoit Charlotheaux, Samuel J. Pevzner, Quan Zhong, Nidhi  
903 Sahni, Song Yi, et al. 2014. “A Proteome-Scale Map of the Human Interactome Network.”  
904 *Cell* 159 (5): 1212–26.
- 905 Roux, Kyle J., Dae In Kim, Manfred Raida, and Brian Burke. 2012. “A Promiscuous Biotin  
906 Ligase Fusion Protein Identifies Proximal and Interacting Proteins in Mammalian Cells.”  
907 *The Journal of Cell Biology* 196 (6): 801–10.
- 908 Rual, Jean-François, Kavitha Venkatesan, Tong Hao, Tomoko Hirozane-Kishikawa, Amélie  
909 Dricot, Ning Li, Gabriel F. Berriz, et al. 2005. “Towards a Proteome-Scale Map of the  
910 Human Protein-Protein Interaction Network.” *Nature* 437 (7062): 1173–78.
- 911 Sahni, Nidhi, Song Yi, Quan Zhong, Noor Jaikhani, Benoit Charlotheaux, Michael E. Cusick, and  
912 Marc Vidal. 2013. “Edgotype: A Fundamental Link between Genotype and Phenotype.”  
913 *Current Opinion in Genetics & Development* 23 (6): 649–57.
- 914 Salas, Daniela, R. Greg Stacey, Mopelola Akinlaja, and Leonard J. Foster. 2020.  
915 “Next-Generation Interactomics: Considerations for the Use of Co-Elution to Measure  
916 Protein Interaction Networks.” *Molecular & Cellular Proteomics: MCP* 19 (1): 1–10.
- 917 Schlecht, Ulrich, Zhimin Liu, Jamie R. Blundell, Robert P. St Onge, and Sasha F. Levy. 2017. “A  
918 Scalable Double-Barcode Sequencing Platform for Characterization of Dynamic  
919 Protein-Protein Interactions.” *Nature Communications* 8 (May): 15586.
- 920 Schlecht, Ulrich, Molly Miranda, Sundari Suresh, Ronald W. Davis, and Robert P. St Onge.  
921 2012. “Multiplex Assay for Condition-Dependent Changes in Protein-Protein Interactions.”  
922 *Proceedings of the National Academy of Sciences of the United States of America* 109  
923 (23): 9213–18.
- 924 Sinz, Andrea. 2010. “Investigation of Protein-Protein Interactions in Living Cells by Chemical  
925 Crosslinking and Mass Spectrometry.” *Analytical and Bioanalytical Chemistry* 397 (8):  
926 3433–40.

- 927 Smith, Lloyd M., Neil L. Kelleher, and Consortium for Top Down Proteomics. 2013. "Proteoform:  
928 A Single Term Describing Protein Complexity." *Nature Methods* 10 (3): 186–87.
- 929 Stark, Chris, Bobby-Joe Breitkreutz, Teresa Reguly, Lorrie Boucher, Ashton Breitkreutz, and  
930 Mike Tyers. 2006. "BioGRID: A General Repository for Interaction Datasets." *Nucleic Acids*  
931 *Research*. <https://doi.org/10.1093/nar/gkj109>.
- 932 Strahm, Y. 1999. "The RNA Export Factor Gle1p Is Located on the Cytoplasmic Fibrils of the  
933 NPC and Physically Interacts with the FG-Nucleoporin Rip1p, the DEAD-Box Protein  
934 Rat8p/Dbp5p and a New Protein Ymr255p." *The EMBO Journal*.  
935 <https://doi.org/10.1093/emboj/18.20.5761>.
- 936 Swords, Edward W. 2003. "Chemical Transformation of E. Coli." *Methods Mol Bio* 235: 49–53.
- 937 Tarassov, Kirill, Vincent Messier, Christian R. Landry, Stevo Radinovic, Mercedes M. Serna  
938 Molina, Igor Shames, Yelena Malitskaya, Jackie Vogel, Howard Bussey, and Stephen W.  
939 Michnick. 2008. "An in Vivo Map of the Yeast Protein Interactome." *Science* 320 (5882):  
940 1465–70.
- 941 Trigg, Shelly A., Renee M. Garza, Andrew MacWilliams, Joseph R. Nery, Anna Bartlett, Rosa  
942 Castanon, Adeline Goubil, et al. 2017. "CrY2H-Seq: A Massively Multiplexed Assay for  
943 Deep-Coverage Interactome Mapping." *Nature Methods* 14 (8): 819–25.
- 944 UniProt Consortium. 2021. "UniProt: The Universal Protein Knowledgebase in 2021." *Nucleic*  
945 *Acids Research* 49 (D1): D480–89.
- 946 Venkatesan, Kavitha, Jean-François Rual, Alexei Vazquez, Ulrich Stelzl, Irma Lemmens,  
947 Tomoko Hirozane-Kishikawa, Tong Hao, et al. 2009. "An Empirical Framework for Binary  
948 Interactome Mapping." *Nature Methods* 6 (1): 83–90.
- 949 Vidal, Marc, Michael E. Cusick, and Albert-László Barabási. 2011. "Interactome Networks and  
950 Human Disease." *Cell* 144 (6): 986–98.
- 951 Walhout, Albertha J. M., Gary F. Temple, Michael A. Brasch, James L. Hartley, Monique A.  
952 Lorson, Sander van den Heuvel, and Marc Vidal. 2000. "[34] GATEWAY Recombinational  
953 Cloning: Application to the Cloning of Large Numbers of Open Reading Frames or  
954 ORFeomes." *Methods in Enzymology*. [https://doi.org/10.1016/s0076-6879\(00\)28419-x](https://doi.org/10.1016/s0076-6879(00)28419-x).
- 955 Yachie, Nozomu, Evangelia Petsalaki, Joseph C. Mellor, Jochen Weile, Yves Jacob, Marta  
956 Verby, Sedide B. Ozturk, et al. 2016. "Pooled-Matrix Protein Interaction Screens Using  
957 Barcode Fusion Genetics." *Molecular Systems Biology* 12 (4): 863.
- 958 Yang, Fang, Yingying Lei, Meiling Zhou, Qili Yao, Yichao Han, Xiang Wu, Wanshun Zhong, et al.  
959 2018. "Development and Application of a Recombination-Based Library versus Library  
960 High- Throughput Yeast Two-Hybrid (RLL-Y2H) Screening System." *Nucleic Acids*  
961 *Research* 46 (3): e17.
- 962 Yang, Jae-Seong, Mireia Garriga-Canut, Nele Link, Carlo Carolis, Katrina Broadbent, Violeta  
963 Beltran-Sastre, Luis Serrano, and Sebastian P. Maurer. 2018. "Rec-YnH Enables  
964 Simultaneous Many-by-Many Detection of Direct Protein-Protein and Protein-RNA  
965 Interactions." *Nature Communications* 9 (1): 3747.
- 966 Yu, Clinton, and Lan Huang. 2018. "Cross-Linking Mass Spectrometry: An Emerging  
967 Technology for Interactomics and Structural Biology." *Analytical Chemistry* 90 (1): 144–65.
- 968 Yu, Haiyuan, Pascal Braun, Muhammed A. Yildirim, Irma Lemmens, Kavitha Venkatesan, Julie  
969 Sahalie, Tomoko Hirozane-Kishikawa, et al. 2008. "High-Quality Binary Protein Interaction  
970 Map of the Yeast Interactome Network." *Science* 322 (5898): 104–10.
- 971 Yu, Haiyuan, Leah Tardivo, Stanley Tam, Evan Weiner, Fana Gebreab, Changyu Fan, Nenad  
972 Svrzikapa, et al. 2011. "Next-Generation Sequencing to Generate Interactome Datasets."  
973 *Nature Methods* 8 (6): 478–80.

974
